## Molecular systematics of *Gagea* and *Lloydia* (Liliaceae; Liliales): implications of analyses of nuclear ribosomal and plastid DNA sequences for infrageneric classification

M. Zarrei<sup>1,2,3,4,\*</sup>, P. Wilkin<sup>1</sup>, M. F. Fay<sup>1</sup>, M. J. Ingrouille<sup>2</sup>, S. Zarrei<sup>4</sup> and M. W. Chase<sup>1</sup>

<sup>1</sup>Royal Botanic Gardens, Kew, Richmond TW9 3AB, UK, <sup>2</sup>School of Biological and Chemical Science, Birkbeck College, University of London, Mallet Street, London WC1E 7HX, UK, <sup>3</sup>Department of Biology, College of Basic Science, University of Shahed, PO Box 1815-1159, Tehran, Iran and <sup>4</sup>Department of Plant Biology, School of Biology, University College of Sciences, University of Tehran, PO Box 14155-6455, Tehran, Iran

Received: 3 January 2007 Returned for revision: 15 March 2007 Accepted: 16 March 2009 Published electronically: 17 May 2009

• **Background and Aims** *Gagea* is a Eurasian genus of petaloid monocots, with a few species in North Africa, comprising between 70 and approximately 275 species depending on the author. *Lloydia* (thought to be the closest relative of *Gagea*) consists of 12–20 species that have a mostly eastern Asian distribution. Delimitation of these genera and their subdivisions are unresolved questions in Liliaceae taxonomy. The objective of this study is to evaluate generic and infrageneric circumscription of *Gagea* and *Lloydia* using DNA sequence data.

• **Methods** A phylogenetic study of *Gagea* and *Lloydia* (Liliaceae) was conducted using sequences of nuclear ribosomal internal transcribed spacer (ITS) and plastid (*rpl16* intron, *trnL* intron, *trnL-F* spacer, *matK* and the *psbA-trnH* spacer) DNA regions. This included 149 accessions (seven as outgroups), with multiple accessions of some taxa; 552 sequences were included, of which 393 were generated as part of this research.

• **Key Results** A close relationship of *Gagea* and *Lloydia* was confirmed in analyses using different datasets, but neither *Gagea* nor *Lloydia* forms a monophyletic group as currently circumscribed; however, the ITS and plastid analyses did not produce congruent results for the placement of *Lloydia* relative to the major groups within *Gagea*. *Gagea* accessions formed five moderately to strongly supported clades in all trees, with most *Lloydia* taxa positioned at the basal nodes; in the strict consensus trees from the combined data a basal polytomy occurs. There is limited congruence between the classical, morphology-derived infrageneric taxonomy in *Gagea* (including *Lloydia*) and clades in the present phylogenetic analyses.

• **Conclusions** The analyses support monophyly of *Gagea*/*Lloydia* collectively, and they clearly comprise a single lineage, as some previous authors have hypothesized. The results provide the basis for a new classification of *Gagea* that has support from some morphological features. Incongruence between plastid and nuclear ITS results is interpreted as potentially due to ancient hybridization and/or paralogy of ITS rDNA.

**Key words:** *Gagea*, *Lloydia*, Liliaceae, ITS ribosomal DNA sequences, plastid DNA sequences.

### INTRODUCTION

*Gagea* (Liliaceae) is a geophytic, perennial, largely Eurasian genus with a few species in North Africa; it comprises somewhere between 70 and approx. 275 species, depending on the author (Stroh, 1937; Uphof, 1958–1960; Melchior, 1964; Willis, 1980; Hyam and Pankhurst, 1995; Mabberley, 1997; Levichev, 1999; Peruzzi, 2003; Govaerts, 2006; Zarrei *et al.*, 2007; Peterson *et al.*, 2008). At the time of original publication (Salisbury, 1806), the genus contained only seven species; these had long been placed in *Ornithogalum* L. (Hyacinthaceae; e.g. Gerard, 1663; Linnaeus, 1753, 1762; Pallas, 1773, 1776). Salisbury did not take into consideration priority of the names he used, and this was a source of confusion for later authors (Heyn and Dafni, 1971). Many novel species have been added, particularly in the last two decades (Levichev, 1981, 1988, 1991, 2000, 2001, 2006a; Dasgupta and Deb, 1983; Rechinger, 1986; Levichev and Navruzshoev, 1997; Tison, 2004; Zhao and Zhao, 2004; Henker, 2005; Zarrei and Zarrei,

2005a; Ali, 2006; Levichev and Ali, 2006; Zhao and Yang, 2006; Peruzzi *et al.*, 2007; Hamzaoglu *et al.*, 2008), but a comparative systematic study is needed to elucidate relationships of species and species groups and to clarify taxonomic boundaries.

The first attempt to classify species within *Gagea* was carried out by Koch (1849), who divided the genus into two sections, *Holobolbos* K.Koch and *Didymobolbos* K.Koch, and recognized 17 species; this was followed by the addition of sections *Tribolbos* Boiss. and *Platyspermum* Boiss. (Koch, 1882; Table 1). At the beginning of the 20th Century, Terracciano (1905a, b, 1906) and Pascher (1904, 1907) made major contributions by revising the Asiatic species. Both authors erected independent classifications nearly simultaneously. Pascher (1904; Table 1) classified the species of *Gagea* into two subgenera, *Gagea* (*Eugagea* Pascher, which is properly subgenus *Gagea*; McNeill *et al.*, 2006) with four sections and *Hornungia* (Bernh.) Pascher with two sections, based mainly on seed shape and bulb characters. Three years later, Pascher (1907) published a more extensive treatment with the addition of new species and complete Latin

\* For correspondence. E-mail zarrei@shahed.ac.ir

TABLE 1. Overview of previous infrageneric classifications of *Gagea*

| Boissier (1882)        | Terracciano (1905a, b)   | Pascher (1904, 1907)*            | Grossheim (1935)         | Davlianidze (1976)  | Levichev (1990, 1999b)† |
|------------------------|--------------------------|----------------------------------|--------------------------|---------------------|-------------------------|
| <i>Gagea</i>           | <i>Gagea</i>             | <i>Gagea</i>                     | <i>Gagea</i>             | <i>Gagea</i>        | <i>Gagea</i>            |
|                        | <b>Subgenus</b>          | <b>Subgenus</b>                  | <b>Subgenus</b>          | <b>Subgenus</b>     |                         |
|                        | <i>Gagea</i>             | <i>Gagea</i> (= <i>Eugagea</i> ) | <i>Gagea</i>             | <i>Gagea</i>        |                         |
| <b>Section</b>         | <b>Section</b>           | <b>Section</b>                   | <b>Section</b>           | <b>Section</b>      | <b>Section</b>          |
| <i>Gagea</i>           | <i>Gagea</i>             | <i>Gagea</i>                     | <i>Gagea</i>             | <i>Gagea</i>        | <i>Gagea</i>            |
| (= <i>Holobolbos</i> ) | (= <i>Nudiscaposae</i> ) | ( <i>Holobolbos</i> )            | (= <i>Nudiscaposae</i> ) |                     |                         |
| <i>Tribolbos</i>       |                          | <i>Tribolbos</i>                 |                          |                     |                         |
|                        |                          | <i>Monophyllos</i>               |                          |                     |                         |
|                        |                          | <b>Subsection</b>                |                          |                     |                         |
|                        |                          | <i>Minimae</i>                   |                          | <i>Minimae</i>      | <i>Minimae</i>          |
|                        |                          |                                  |                          |                     | <i>Spathaceae</i>       |
|                        |                          | <i>Fistulosae</i>                |                          | <i>Fistulosae</i>   | <i>Fistulosae</i>       |
| <i>Didymobolbos</i>    | <i>Foliatae</i>          | <i>Didymobolbos</i>              | <i>Foliatae</i>          | <i>Didymobolbos</i> | <i>Didymobolbos</i>     |
|                        | <i>Gageastrum</i>        | <i>Hornungia</i>                 |                          |                     |                         |
| <i>Platyspermum</i>    | <i>Verticillatae</i>     | <i>Platyspermum</i>              | <i>Platyspermum</i>      | <i>Platyspermum</i> | <i>Platyspermum</i>     |
|                        |                          |                                  |                          |                     | <i>Graminifoliae</i>    |
|                        |                          |                                  |                          |                     | <i>Incrustatae</i>      |
|                        |                          |                                  |                          |                     | <i>Bulbiferae</i>       |
|                        |                          | <i>Stipitatae</i>                |                          | <i>Stipitatae</i>   | <i>Stipitatae</i>       |
|                        |                          |                                  |                          |                     | <i>Dschungaricae</i>    |
|                        |                          | <i>Plecostigma</i>               | <i>Plecostigma</i>       |                     | <i>Plecostigma</i>      |
|                        | <i>Anthericoides</i>     |                                  |                          |                     | <i>Anthericoides</i>    |

The classifications are complete only at subgeneric and sectional levels. The only subsections listed are those later raised to section level by Davlianidze (1976).

\* Stroh (1937) and Uphof (1958–1960) followed the same classification as Pascher (1904, 1907). See text for details.

† Levichev's classification (1990, 1999b, 2006b) has been updated by Levichev in Peterson *et al.* (2008).

descriptions, but he maintained his previous infrageneric taxa with some additional subsections (Table 1). Terracciano (1905a, b, 1906) also adopted two subgenera, *Gagea* and *Gageastrum*, with two sections under each (Table 1). Neither author produced a complete revision. However, Pascher's treatment was favoured by several authors, including Stroh (1937), Uphof (1958–1960) and Rechinger (1986). Two major monographic classifications of *Gagea* were produced by Stroh (1937) and Uphof (1958–1960), with 124 and 106 species names, respectively, each representing an updated version of Pascher's (1907) classification. Following the classification of Pascher (1904, 1907), Stroh and Uphof divided *Gagea* into his subgenera, sections and subsections. Because many new descriptions have since appeared, particularly from the Middle East and Central Asia, the species treatments of Stroh (1937) and Uphof (1958–1960) are now substantially out of date. Although there has been no attempt to revise them completely, there are some more recent regional classifications. For example, after studying morphology and karyology, Davlianidze (1976) treated 26 species present in the Caucasus and accepted the two subgenera previously followed by Uphof (1958) and Stroh (1937); he also established six new sections within each of those subgenera (Table 1). Levichev (1990) published a new classification of the western Tien Shan species using general morphological features as well as cross-sections of radical leaves and stem-base characters. Levichev (1990) did not use the subgeneric rank and divided the genus into ten sections, some of which were the same as those of Davlianidze (1976). Apart from Davlianidze (1976) and Levichev (1990), who published new classifications, several authors (Heyn and Dafni, 1971, 1977; Dasgupta and Deb, 1983; Feinburn-Dotham, 1986;

Wendelbo and Rechinger, 1990; Federov, 2001; Grubov and Egorova, 2003) have accepted the general outline of Pascher's infrageneric classification (1904, 1907) with few modifications. However, recent papers such as Zarrei and Zarre (2005a, b), Peruzzi *et al.* (2008a, b) and Peterson *et al.* (2008) have instead referred to Levichev's classification (Levichev, 1990).

*Lloydia* Salisb., a small bulbiferous herb from the temperate Northern Hemisphere, has always been considered the closest relative of *Gagea*. *Lloydia* consists of 12–20 species (Willis 1980; Hyam and Pankhurst, 1995; Mabblerley, 1997; Govaerts, 2006) that have a mostly eastern Asian distribution. The only species that occurs in Europe is *L. serotina* (L.) Rchb., which is also distributed in western North America (Phillips and Rix, 1989). It is a protected species in Britain and has some ornamental use, unlike most species of *Gagea*. *Lloydia* replaces *Gagea* in the Himalayas and adjoining areas, although some species of *Gagea* reach Japan [e.g. *G. lutea* (L.) Ker-Gawl]. The taxonomic status of *Lloydia* has been problematic since its description by Salisbury and validation by Reichenbach in 1830 (Dasgupta and Deb, 1986). Many species have been moved between *Gagea* and *Lloydia* in the last two centuries. For example, *L. libanotica* Hochst. and *L. graeca* (L.) Endl. ex. Kunth are now known as *G. libanotica* (Hochst) Greuter and *G. graeca* (L.) Irmisch, respectively (Greuter, 1970).

The study of core Liliales conducted by Patterson and Givnish (2002) using a combined sequence matrix of plastid *rbcl* and *ndhF* genes (with only one accession each from *Gagea* and *Lloydia*) showed that these two are sister taxa in a highly supported clade [bootstrap percentage (BP) 100]. Rønsted *et al.* (2005) produced the same result for *Gagea*

*wilczekii* (= *G. algeriensis*) and *Lloydia serotina* using a different plastid dataset (*matK*, *trnK* intron). Another analysis of *psbA-trnH* and *trnL-F* sequence data (Peterson *et al.*, 2004) confirmed the monophyly of seven species of *Gagea* and *Lloydia serotina* from Germany, with BPs of 99 and 100 using different datasets.

Analysis based on phenotypic (morphological) data (Patterson and Givnish, 2002) resulted in a weakly supported clade (BP 56) containing *Gagea* and *Lloydia*. This low support may be because they included all genera of Liliales and did not include additional characters that are specific to tribe Tulipeae, in which both *Gagea* and *Lloydia* are placed.

A detailed examination of pollen morphology of Iranian representatives of *Gagea* (Zarrei and Zarre, 2005b) revealed that sculpturing of the exine provides valuable characters for separation of species, sometimes even closely related ones, and delimitation of natural groups within the genus. Zarrei and Zarre (2005b) distinguished four basic pollen types within *Gagea*.

Chromosome counts for 100 taxa have been reported (Peruzzi, 2003, 2008; Peruzzi and Aquaro, 2005). The base chromosome number is  $x = 12$  among species of known chromosome number, and 37.8% of the studied species have this number and are diploid (Peruzzi, 2003). Chromosome studies suggested that asymmetric karyotypes are an ancestral feature, whereas more balanced ones are derived (Peruzzi and Aquaro, 2005), but this hypothesis needs reconsideration within a phylogenetic framework.

Molecular phylogenetic studies (mostly of plastid DNA) that have included single exemplars of *Gagea* [*Gagea wilczekii* Braun-Blanq. & Maire (= *Gagea algeriensis* Chabert)] and *Lloydia* (*L. serotina*) support a close relationship of the genera, but provide no insight into generic circumscription (Kosenko and Levichev, 1988; Kosenko, 1999; Fay and Chase, 2000; Patterson and Givnish, 2002; Rønsted *et al.*, 2005). A molecular phylogenetic study of seven *Gagea* species from Germany was undertaken by Peterson *et al.* (2004), using plastid DNA sequences (*trnL* intron, *trnL-F* spacer and the *psbA-trnH* spacer) and the nuclear the internal transcribed spacer (ITS) ribosomal region. In this analysis, *L. serotina* was used initially as outgroup, but it was placed among the *Gagea* species in all analyses of plastid data. Subsequent analyses that included morphological data also cast doubt on the validity of maintaining *Lloydia* and *Gagea* as distinct genera (Peterson and Peterson, 2005, 2006). Combined analyses of plastid and ITS DNA demonstrated that *G.* section *Didymobolbos* forms a clade with *G.* section *Monophyllos sensu* Pascher (in particular with *G.* section *Minimae* and *G.* section *Euspathaceae sensu* Levichev) and that *G.* section *Gagea* (*Holobolbos sensu* Pascher) forms a clade with *G.* section *Tribolbos*. Indeed, the last section has been merged by recent authors with *G.* section *Gagea* (Levichev, 1990; Peruzzi & Aquaro, 2005; Peruzzi *et al.*, 2007). Molecular and morphological study of *Gagea* and *Lloydia* has been conducted by Peterson *et al.* (2008), revealing a close relationship between these two genera and further undermining the concept of *Lloydia* as a distinct genus. Moreover, these studies broadly supported Levichev's classification (Levichev, 1990). Peruzzi *et al.* (2008a) proposed the genus *Lloydia* as a section within *Gagea*. A detailed

phylogenetic study of *Gagea* species in Italy has also been conducted by Peruzzi *et al.* (2008b).

To further evaluate phylogenetic relationships of *Lloydia* and *Gagea* and the infrageneric classification of *Gagea*, nuclear (ITS) and plastid (*rpl16* intron, *trnL* intron, *trnL-F* spacer, *matK* and the *psbA-trnH* spacer) DNA data are used here. We have included species representing as many morphologically based species-groups of *Lloydia* and *Gagea* as possible and also aimed for broad geographical sampling of species. The phylogenetic analyses include previously published DNA data and address relationships between and within the two genera; the results are also compared with previous classifications of *Gagea*.

## MATERIALS AND METHODS

### *Plant material*

Silica gel-preserved samples of leaf tissue from field collections and, in a few cases, herbarium specimens were used for DNA extraction (see Appendix for source information). The ingroup comprised 142 accessions. In all analyses, *Tulipa clusiana* DC., *T. lehmanniana* Merckl., *T. uniflora* (L.) Besser ex Baker, *Amana erythronioides* (Baker) D.Y.Tan & D.Y.Hong, *Erythronium japonicum* Decne., *Fritillaria persica* L. and *Lilium ledebourii* (Baker) Boiss. served as outgroups, based on the results of Rønsted *et al.* (2005).

### *DNA extraction, marker amplification and sequencing*

Genomic DNA extractions were performed using 0.01–0.23 g of silica-dried leaves or 0.01–0.08 g of leaf tissue from herbarium sheets and a modified version of the 2× CTAB method of Doyle and Doyle (1987). Before precipitation, an aliquot of 150 µL was purified using the NucleoSpin Extract II PCR purification kit (Machery-Nagel, GmbH & Co. KG, Düren, Germany) following the manufacturer's protocols; this provided a small amount of DNA that was able to be used the same day for amplification. The remainder of the DNA was precipitated in 2.5 volumes ethanol (for herbarium specimens, 2/3 volume isopropanol was used instead of ethanol). DNA samples were then purified using a caesium chloride/ethidium bromide gradient (1.55 g mL<sup>-1</sup>) followed by removal of the ethidium bromide with butanol, dialysis and storage at –80 °C in the DNA Bank at the Royal Botanic Gardens, Kew (<http://www.data.kew.org/dnabank/homepage.html>).

Amplification of the *psbA-trnH* spacer was undertaken using previously published primers for *psbA* (Sang *et al.*, 1997) and *trnH* (Tate and Simpson, 2003). Owing to the small size of this fragment (339–438 bp), only the *psbA* primer was used for sequencing, unless there were ambiguities that needed resolving in the single electropherogram produced. Amplification of the *rpl16* intron was carried out using the primers 71F and 1661R of Jordan *et al.* (1996). In many cases the internal primer 158F, designed originally for palms (5'-AAGAA ACAGTCACTATATGA-3'; C. Asmussen, University of Copenhagen, unpubl. res.), was used to avoid a long region of T/A, which interfered with sequencing at the beginning of

the *rpl16* intron. For degraded DNA from herbarium material, two internal primers were designed for this project, 576F (5'-GATGGCGGAATGAACCAAGA-3') and 657R (5'-GTT TCGCGGGCGAATAT TGA-3'), and both were used to amplify the *rpl16* intron in two pieces, in this case 71F + 657R and 576F + 1661R. These primers were also used for sequencing.

The *trnL-F* region (including *trnL* intron and *trnL-F* spacer) was amplified with primers *c* and *f* of Taberlet *et al.* (1991). In some older herbarium material, the *trnL-F* region was amplified in two pieces using primers *d* and *e* designed by Taberlet *et al.* (1991; *c* + *d* and *e* + *f*).

In a similar way, *matK* was amplified in two pieces using primers 19F (Molvray *et al.*, 2000) and 1326R (Sun *et al.*, 2001) for the first piece and 390F (Sun *et al.*, 2001) and 1565R (5'-TCACCAGGTCATTGACACGAA-3'), which we designed for this study. In three cases, 2R (Johnson and Soltis, 1994) was used instead for the reverse primer. For sequencing, 19F and 1326R were used for the first fragment, but only 1565R was used for the second piece because of the large degree of overlap of the two fragments.

Amplification of the ITS region of 18S–26S nuclear ribosomal DNA was carried out using primers 17SE and 26SE of Sun *et al.* (1994). Primers ITS2, ITS3, ITS4 and ITS5 (White *et al.*, 1990) were used for herbarium material to amplify ITS in two pieces (ITS5 + ITS2, ITS3 + ITS4). DMSO (2%; dimethylsulfoxide) was added to reduce secondary structure problems common in ITS (Winship, 1989; Baldwin *et al.*, 1995; Chase *et al.*, 2003). In all cases, amplified products were purified using NucleoSpin PCR purification columns in accordance with the manufacturer's protocols. Cycle sequencing reactions were performed using the BigDye Terminator Kit ver. 3.1 (Applied Biosystems, Inc., ABI, Warrington, UK). Cycle sequencing products were cleaned using Magnesil (Promega product, Southampton, UK) on a Beckman Coulter robot (Biomek NX S8, Buckinghamshire, UK) following the manufacturer's protocols. Cleaned products were then sequenced on an ABI 3730 following the manufacturer's protocols.

#### Sequence alignment and phylogenetic analysis

For this paper, 393 new sequences were generated; 159 sequences of ITS, *psbA-trnH* and *trnL-F* intergenic spacer (IGS) of some taxa were downloaded from GenBank (<http://www.ncbi.nlm.nih.gov>). GenBank accession numbers for all sequences are listed in the Appendix. New DNA sequences were edited and assembled using Sequence Navigator ver.

1.0 and Autoassembler ver. 1.4.0 (ABI), respectively. All sequences were easily aligned by eye using PAUP v. 4.0b10 for Macintosh (Swofford, 2002), following the guidelines of Kelchner (2000). The matrices are available as NEXUS files upon email request from M.W.C. or M.Z. Parsimony analyses were undertaken using PAUP v. 4.0b10 for Macintosh (Swofford, 2002). All changes were assessed as unordered and were equally weighted (Fitch parsimony; Fitch, 1971).

The data were analysed in three steps. First (analysis I; results not shown), all data were analysed as separate plastid regions. Species for which sequences were taken from GenBank had significant missing data for these plastid regions (e.g. no sequences were available for *matK* and *rpl16* intron in GenBank). BPs were low, which is why these are not shown; these analyses were performed to determine the degree to which our plastid sequences and those previously published were in agreement, which they generally were. Then, we ran analyses of newly generated sequences only as separate plastid and ITS matrices (i.e. no separate analyses of the individual plastid regions; analysis II). Thirdly, combined analyses were run for all data (ITS plus plastid regions) generated in this paper plus the sequences downloaded from GenBank (analysis III). We were worried that the amount of missing data would make evaluation of incongruence and internal support difficult; missing data might reduce bootstrap support and thus might conceal hard incongruence (Cameron *et al.*, 2001). Thus, we analysed all data produced only by us as combined plastid and ITS matrices on only the sequences generated for this study, which are with few exceptions (Appendix) complete for each of our accessions (analysis IV).

All searches were conducted using 1000 random taxon-addition replicates, tree-bisection-reconnection (TBR) branch swapping and MulTrees on (i.e. keeping multiple, equally parsimonious trees). Ten trees only were saved from each replicate to reduce search time on potentially thousands of trees. All trees collected were then used as starting trees in another search without a tree limit. Support for clades was estimated using 1000 bootstrap replicates (Felsenstein, 1985), with simple taxon addition, and TBR swapping but permitting only ten trees per replicate to be held. Groups were retained with BP  $\geq$  50. Summary data for all analyses are presented in Table 2.

## RESULTS

### Analysis I

The trees obtained from separate analyses of the plastid regions of all available datasets show limited resolution, and

TABLE 2. Tree and matrix statistics related to the various datasets and analysis

| Analyses        | No. of positions | No. of variable positions | No. of parsimony-informative positions | No. of trees | Length | CI   | RI   |
|-----------------|------------------|---------------------------|----------------------------------------|--------------|--------|------|------|
| ITS             | 706              | 312 (44 %)                | 253 (36 %)                             | 8152         | 850    | 0.62 | 0.89 |
| Plastid         | 3474             | 727 (21 %)                | 507 (15 %)                             | 7620         | 1115   | 0.75 | 0.93 |
| Combined total* | 4180             | 1039 (25 %)               | 760 (18 %)                             | 7276         | 1993   | 0.68 | 0.91 |
| Combined total† | 4180             | 1088 (26 %)               | 810 (19 %)                             | 6430         | 2388   | 0.62 | 0.90 |

\* Only newly generated datasets.

† Whole datasets including sequences from GenBank.

therefore these trees are not presented. Statistics from these separate plastid analyses are shown in Table 2.

#### Analysis II, ITS

Analysis of 78 ITS sequences yielded 8152 equally most-parsimonious trees, each of length (L) = 850 steps, consistency index (CI) = 0.62 and retention index (RI) = 0.89. Tree and matrix statistics are presented in Table 2. One of the most-parsimonious trees was randomly selected and is shown in Fig. 1. *Gagea* and *Lloydia* collectively are supported as monophyletic within Liliaceae (BP 100), but neither is monophyletic (Fig. 1). Species of *Lloydia* are dispersed throughout the tree. *Lloydia serotina* and *L. delicatula* Noltie comprise a well-supported clade (BP 95). *Lloydia flavonutans* and *L. oxycarpa* also form a pair (BP 100). Apart from *Gagea graeca*, which is sister to the rest of the ingroup (BP 94), all other members of *Gagea* form four well-supported clades (clades A–D; BPs = 99–100). These five *Gagea* clades (including *G. graeca*) were recovered in all the different analyses presented here. Bootstrap support for each clade is high in every tree. However, there are a small number of soft incongruences regarding the placement of some constituent taxa of those clades, and these are discussed below.

#### Analysis II, plastid regions

Analyses of the newly generated data for plastid regions included 87 accessions, of which seven were outgroups (tree and matrix statistics are presented in Table 2). The strict consensus tree with BPs is presented in Fig. 2. The ingroup is strongly supported (BP 100). Neither *Gagea* nor *Lloydia* accessions form monophyletic groups. The topology of the tree differs from that obtained from analysis of the combined matrix (see Fig. 4) regarding the relative positions of *Lloydia* taxa. All *Lloydia* accessions and *G. graeca* form a grade within a larger, moderately supported clade (BP 81; Fig. 2) that also includes clade A. Although the major clades A–D are strongly supported (BP = 90–100), they form a polytomy in the strict consensus tree.

#### Combined matrix of all datasets including sequences from GenBank (analysis III)

The combined matrix included 135 accessions of *Gagea*, seven of *Lloydia* and seven outgroups species. Tree and matrix statistics are presented in Table 2. Figure 3A and B show one of the most-parsimonious trees selected randomly from 6430 trees. In this analysis, *Lloydia* and *Gagea* together comprise a strongly supported clade (BP 100; Fig. 3A, B). All *G. graeca* accessions are collectively sister to all other accessions of *Lloydia* and *Gagea*, but with low support (BP 59).

The spine of the tree is poorly resolved, but multiple accessions of the same species and groups of closely related species form clades, in some cases with moderate to strong bootstrap support. Clades A, B and D are well supported, but apart from within clade A, taxa within these clades mainly form polytomies. These polytomies usually comprise species that morphology indicates are closely related.

*Lloydia* species occur in three distinct parts of the trees. *Lloydia serotina* and *L. delicatula* are among a weakly supported polytomy towards the basal nodes of the tree. However, *L. yunnanensis* Franch. is sister to other accessions in clade A (BP 79; Fig. 3A). *Lloydia oxycarpa* Franch. and *L. flavonutans* H.Hara form a clade (BP 100).

#### Combined matrix of newly generated sequences (analysis IV)

Owing to the amount of missing data for taxa obtained from GenBank, separate analyses were performed using only newly generated sequences (tree and matrix statistics presented in Table 2). Bootstrap percentages (BP ≥ 50) are shown on the strict consensus tree (Fig. 4). The tree generally has the same topology as that obtained from analysis of the ITS matrix (Fig. 1). However, there is incongruence between them in the positions of *G. bulbifera* (Pall.) Salisb. and *L. yunnanensis*. Clade support is relatively high in comparison with those in Fig. 3A and B; for example, clade C, which is completely unresolved in Fig. 3B, has a BP of 100 in Fig. 4. Moreover, clade membership is not identical in clade C in all the analyses. However, there is weak support (BP 53) for *G. graeca* being sister to all other members of the ingroup.

## DISCUSSION

In the present survey, sequence data were generated from both biparentally (nuclear; Álvarez and Wendel, 2003) and maternally (plastid; Bohdanowicz and Lewandowska, 1999) inherited genomes to reconstruct a phylogenetic tree for *Gagea* and *Lloydia*, controversial and difficult taxa within Liliaceae. For several species, multiple accessions were used to assess intraspecific genetic variation and species delimitation. Consideration was also given to morphological variation within species and geographical distribution when developing the taxon sampling strategy. In many cases, multiple accessions of a single species form clades, usually with high bootstrap support. However, in some species such as *G. setifolia* Baker, accessions are nested in separate clades or interdigitated or unresolved in groupings with accessions of other taxa that have previously been considered to be closely related.

#### Incongruence of plastid and ITS matrices

Owing to the unreliability of the partition homogeneity test in assessing combinability (Farris *et al.*, 1995) as shown by several authors (Reeves *et al.*, 2001; Yoder *et al.*, 2001; Rønsted *et al.*, 2005), incongruence between the plastid and ITS data was investigated by comparing the combined results (Figs 3 and 4) with the those of the separate analyses (Figs 1 and 2) with respect to level of resolution and bootstrap support. Although *G. bulbifera* (Pall.) Salisb. accessions form a strongly supported group with clade C (BP 100) using ITS sequence data (Fig. 1), it does not have support as sister to clade C in analyses of the plastid sequences (Fig. 2). In the combined analysis of all data, this species forms a polytomy with clades B–D (Fig. 4). Thus, its position in the plastid tree is less resolved. We interpreted this as soft rather than a hard incongruence between the ITS rDNA and plastid DNA data, which could be resolved by incorporating more data,

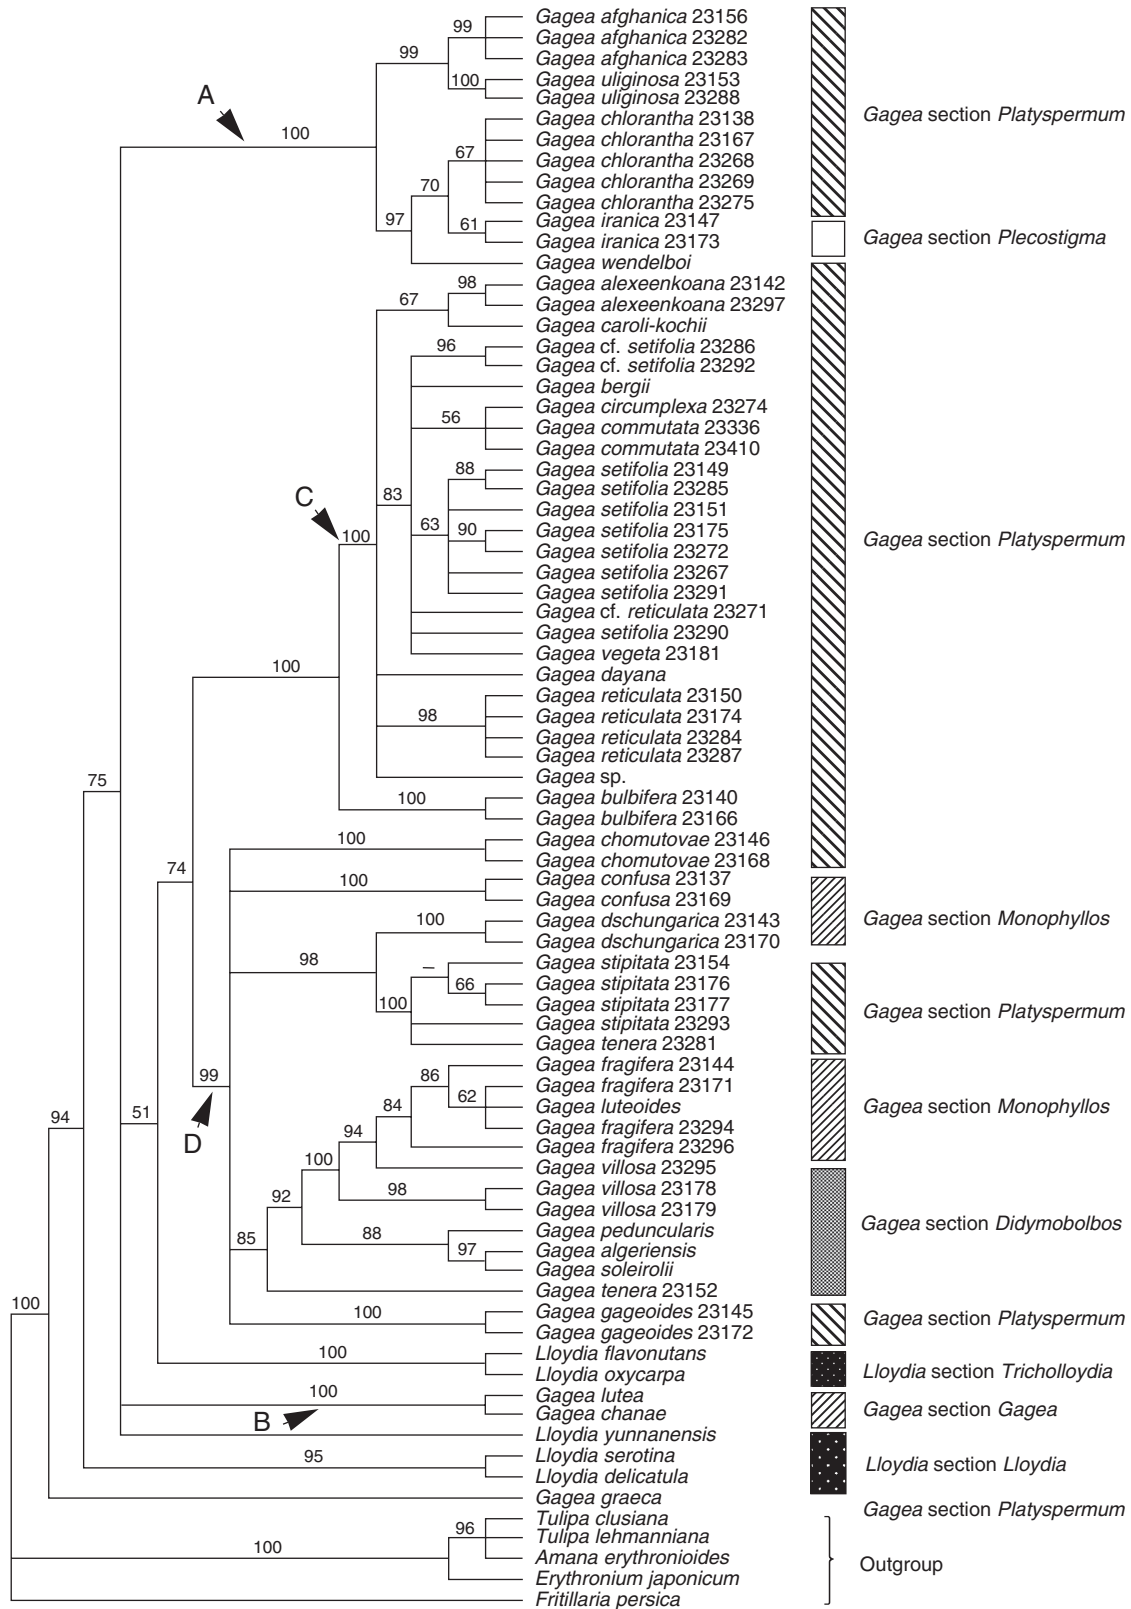

FIG. 1. Bootstrap percentages ( $\geq 50$ ) are indicated above branches on the strict consensus tree of 8152 trees obtained from analysis of nuclear ribosomal ITS (sequences from GenBank are excluded). Branches with a hyphen have BP  $< 50$ .

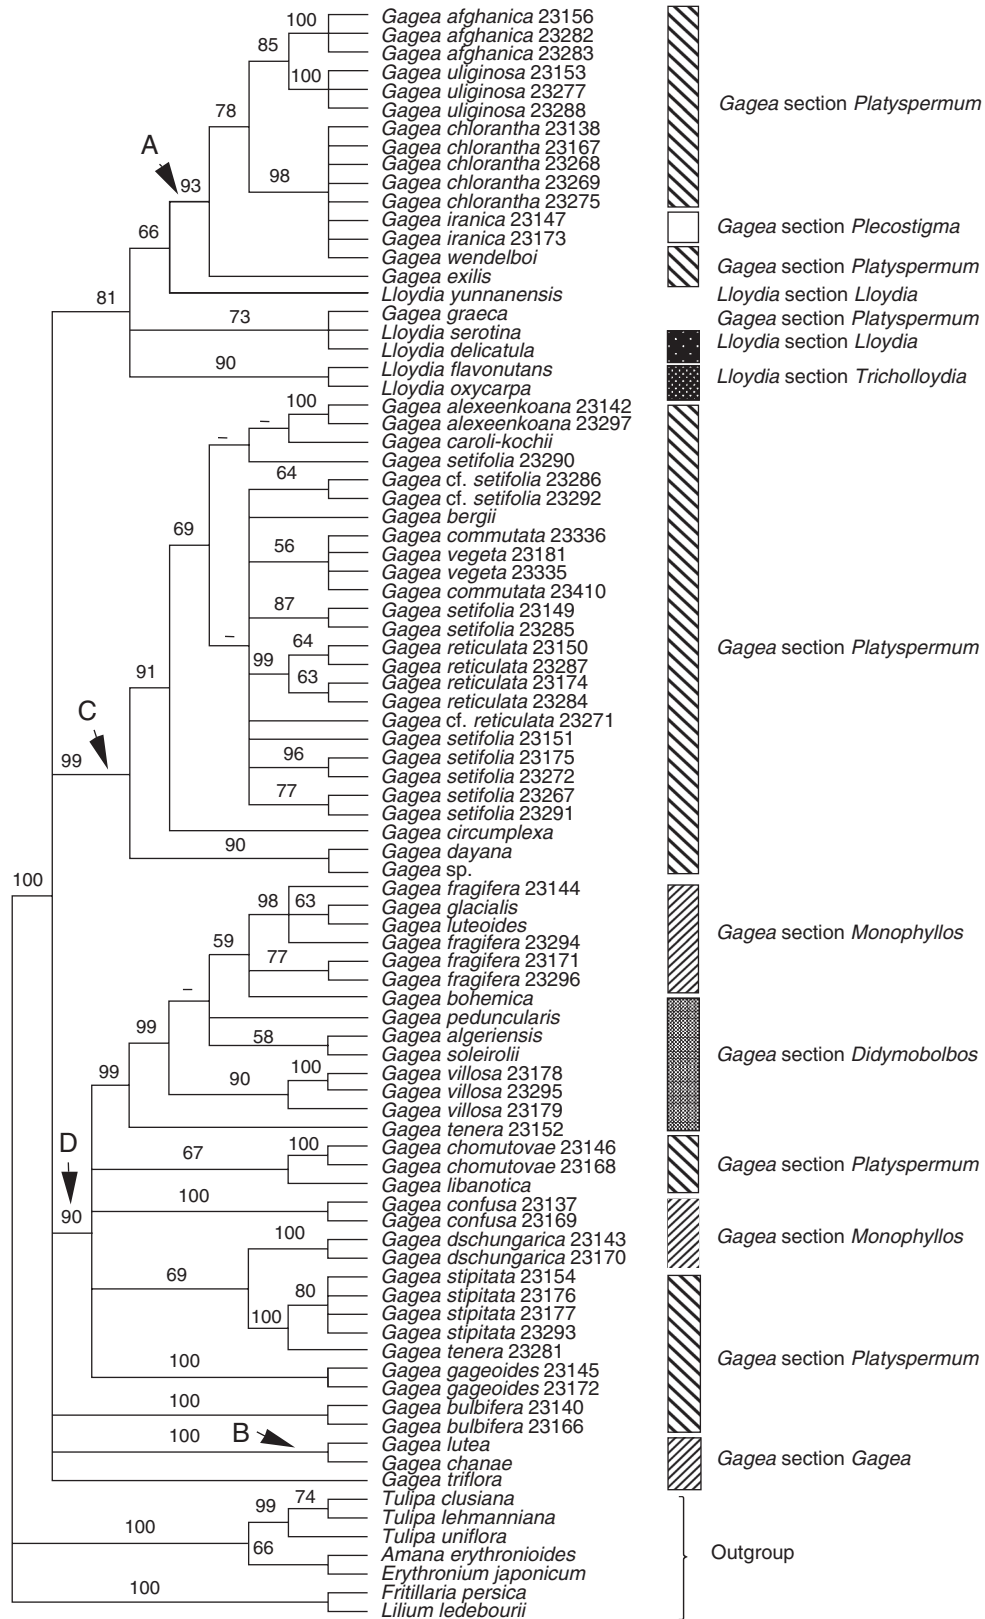

FIG. 2. Bootstrap percentages ( $\geq 50$ ) are indicated above branches on the strict consensus tree of 7620 trees obtained from analysis of the combined plastid data matrix (*rpl16* intron, *trnL* intron, *trnL-F* spacer, *matK* and the *psbA-trnH* spacer; sequences from GenBank are excluded). Branches with a hyphen have BP < 50. Pascher's classification (1904, 1907) is shown next to the tree.

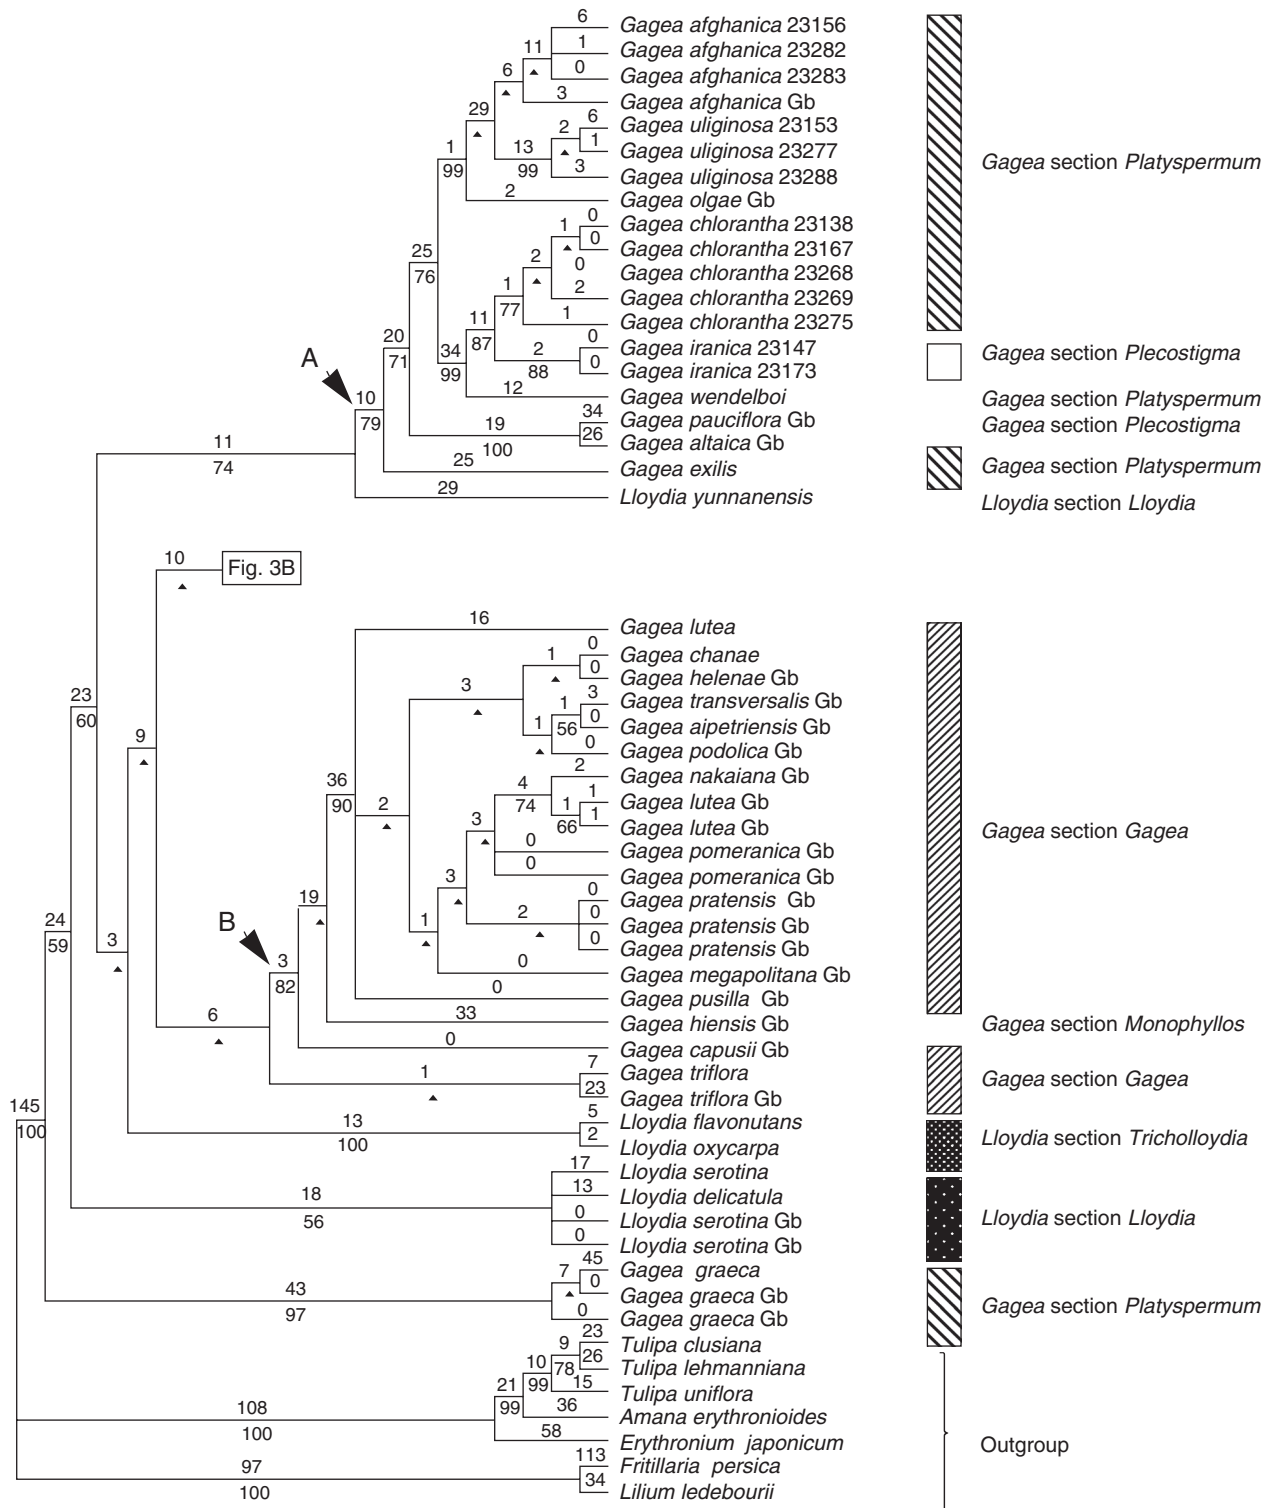

FIG. 3. One of the most-parsimonious trees, randomly selected from 6430 trees, obtained from analysis of the combined data matrix (nuclear ribosomal ITS, and plastid *rpl16* intron, *trnL* intron, *trnL-F* spacer, *matK* and the *psbA-trnH* spacer; sequences from GenBank are included). Tree length = 2388, CI = 0.62, RI = 0.90. Branch lengths (DELTRAN optimization) are indicated above branches and bootstrap percentages below. An arrowhead indicates nodes collapsing in the strict consensus of all most-parsimonious trees. Branches with a hyphen have BP < 50. Gb after the species names indicates those taken from GenBank. For cases in which more than one accession of a species were analysed, numbers after the species names are RBG, Kew, DNA Bank accession numbers (see Appendix).



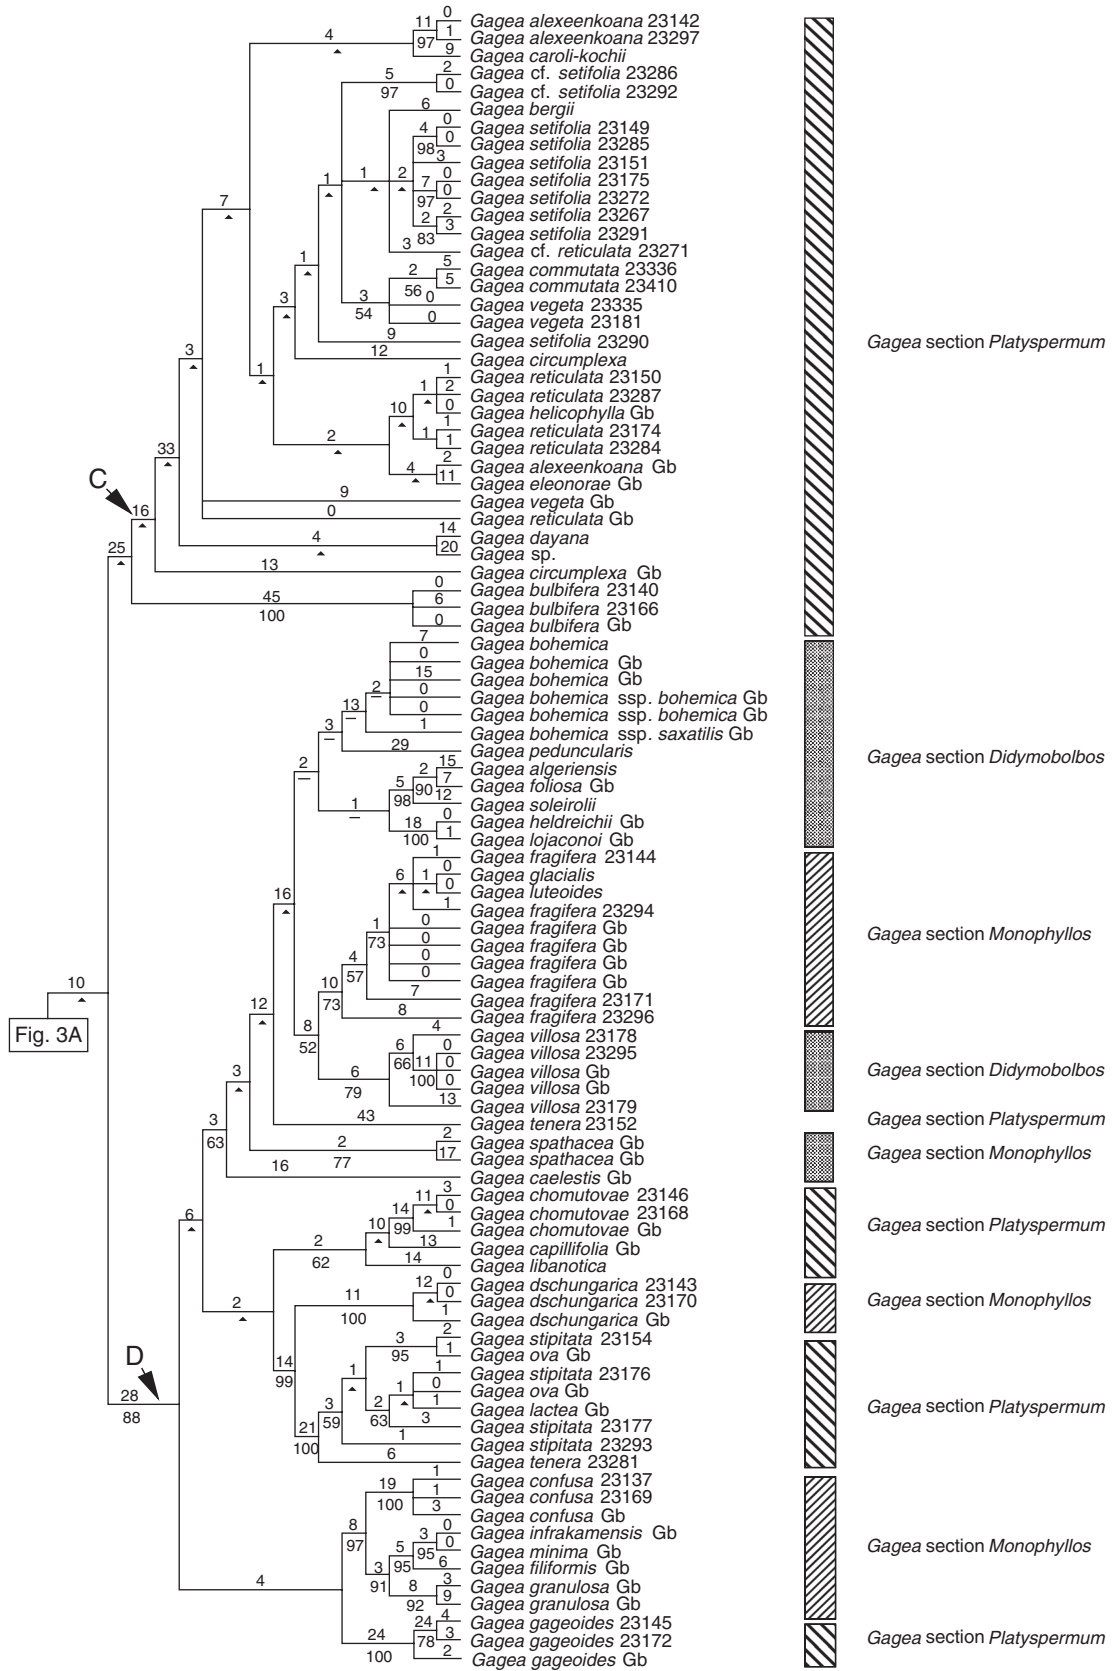

FIG. 3. Continued.

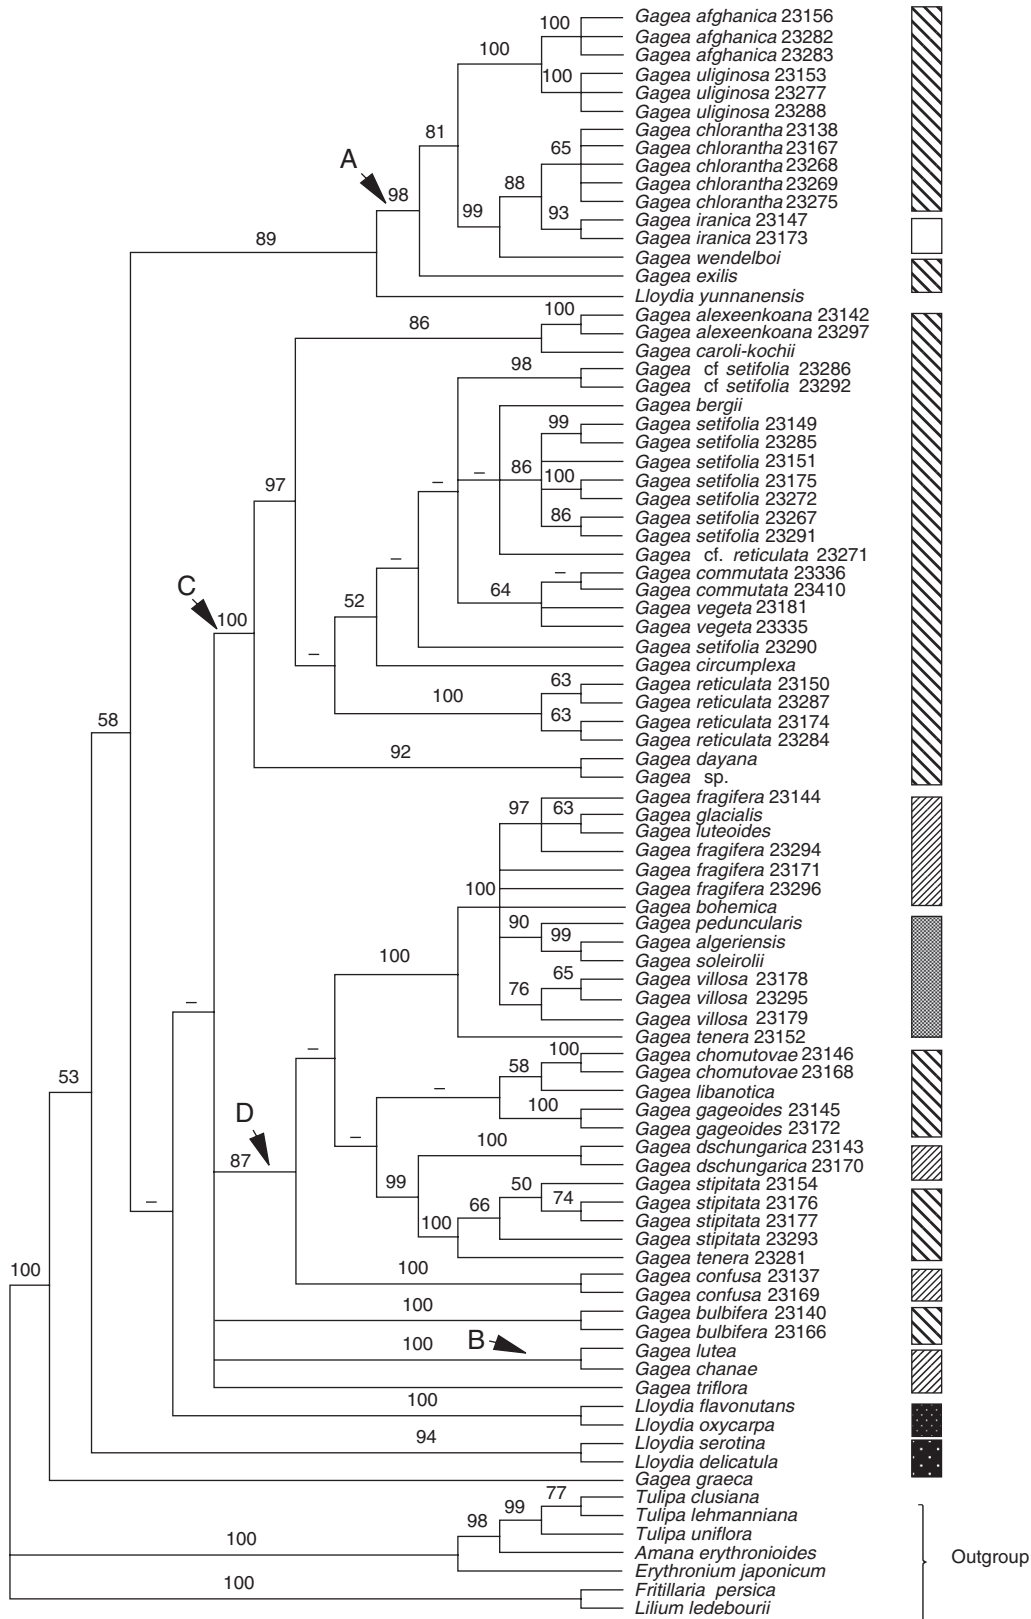

FIG. 4. The strict consensus of 7276 trees obtained from analysis of the combined data matrix (nuclear ITS rDNA and plastid sequences; sequences from GenBank are excluded). Bootstrap percentages ( $\geq 50$ ) are indicated above branches. Branches with a hyphen have BP  $< 50$ .

particularly more rapidly evolving DNA regions than those used in this research.

Although all *Lloydia* species are part of a moderately supported group (BP 81) with clade A in the tree resulting from analyses of combined plastid data (Fig. 2), there are three distinct clades that include *Lloydia* species based on combined ITS and plastid sequences and also the ITS dataset alone (Figs 1, 3 and 4).

We do not have any clear hypotheses regarding the causes of the incongruence. Both ancient hybridization (with *Lloydia* species perhaps sharing a maternal lineage) and paralogy of ITS sequences (Doyle, 1992; Baldwin *et al.*, 1995; Wendel *et al.*, 1995) are possibilities. Differences in tree topologies may also be due to sampling error (too few data, in the case of *Lloydia* species) (see Hulslenbeck *et al.*, 1996; Whitten *et al.*, 2000; Rønsted *et al.*, 2005), but these hypotheses are difficult to distinguish. We are currently sequencing several low-copy, protein-coding nuclear regions and hope that the results of these analyses can shed some light on the phenomena that may have generated the incongruence detected in our analyses. It is clear in all cases that *Lloydia* and *Gagea* are a single entity and cannot be separately recognized. Incongruence within this clade did not prevent the necessary taxonomic transfers. Peruzzi *et al.* (2008a) suggested the transfer of *L. serotina* and *Lloydia delicatula* to *G.* section *Lloydia*.

#### Monophyly of *Gagea plus Lloydia*

A close relationship of *Gagea* and *Lloydia* was confirmed in all of the analyses derived from the independent datasets presented here. All six species of *Lloydia* and all *Gagea* accessions form a highly supported clade (BP 100; Figs 1–4). These results are consistent with those from previous phylogenetic analyses (Patterson and Givnish, 2002; Peterson *et al.*, 2004, 2008; Rønsted *et al.*, 2005; Peruzzi *et al.*, 2008).

#### *Gagea* and subgenera

The widely accepted subgeneric classification first published by Pascher (1904, 1907) and subsequently used by other botanists, e.g. Stroh (1937) and Uphof (1958–1960), is superimposed on all figures presented here with the difference that *Gagea* section *Tribolbos* has been merged with *G.* section *Gagea* in this study as in Davlianidze (1976) and Levichev (1990). According to Pascher (1904, 1907), there are two subgenera, i.e. *Gagea* subgenus *Gagea* and *Hornungia* (Table 1). The former is characterized by having globose, angular or edged seeds whereas the latter possesses flat, thin seeds. Neither of these subgenera is monophyletic in the present study, and sections belonging to these taxa are dispersed throughout the tree (Figs 1–4). This indicates that either or both of the two seed forms, which may have specific adaptive roles, have arisen several times during the evolution of the genus, and that these characters are not suitable for classification within *Gagea* due to parallelism. Most species belonging to *G.* subgenus *Gagea*, which possess thick seeds, are adapted to relatively more humid areas. They are generally found in the Euro-Siberian floristic region (Takhtajan, 1986) and less in the Irano-Turanian region; these species are restricted to higher elevations where there is more

precipitation, particularly in the form of snow. The other subgenus, *G.* subgenus *Hornungia*, with flattened seeds, is adapted to drier conditions and can usually be found in the Irano-Turanian and Saharo-Arabian regions. There are a few species of this group distributed in Europe, but they are mainly restricted to southern and southeastern areas where the climate is drier.

The placement of species in clades A–D described below indicates that these subgenera are polyphyletic.

#### Phylogenetic relationships within *Gagea* and *Lloydia* and infrageneric classification

Although the monophyly of *Lloydia/Gagea* is strongly supported, with few exceptions relationships within this clade are not well resolved. *Lloydia* species are mostly positioned towards the base of trees and in strict consensus trees form a polytomy. This may be due to missing data in the various accessions of *Lloydia* (mostly obtained from herbarium material).

As was the case for *Gagea*, there is no consistency between classical infrageneric taxa in *Lloydia* and the results of our phylogenetic analyses. *Lloydia* section *Lloydia* (*L. yunnanensis*, *L. delicatula* and *L. serotina* included in the present study) and *Lloydia* section *Tricholloydia* Engl. (with *L. oxycarpa* and *L. flavonutans* in the present study) are the two recognized infrageneric taxa of *Lloydia* (Dasgupta and Deb, 1986). These species are dispersed throughout the trees without a recognizable pattern, although closely related species such as *L. oxycarpa* and *L. flavonutans* form well-supported clades (BPs 90–100; Figs 1–4). *Lloydia yunnanensis* is usually sister to clade A in trees from analyses of plastid sequences alone and those from combined plastid and nuclear datasets (Figs 2, 3A and 4). However, nuclear data (ITS) did not resolve it in this position.

In some analyses, *L. serotina* and *L. delicatula* are in a clade with high support (BPs 94–95; Figs 1 and 4). In analysis of the combined plastid dataset (Fig. 2), five species, i.e. *G. graeca*, *L. serotina*, *L. delicatula*, *L. flavonutans* and *L. oxycarpa*, form two clades that are moderately to highly supported but for which relationships to each other and clade A are not resolved. These belong to the two sections of *Lloydia*.

Five major monophyletic, moderately to strongly supported groups are revealed for *Gagea* accessions (Figs 1–4); the first clade includes only *G. graeca*, and the other four are referred to as clades A–D. *Gagea graeca* has an eastern Mediterranean distribution and is one of the few *Gagea* species possessing white to pale pink flowers, which resemble those of some species of *Lloydia*. *Gagea graeca* was placed under *G.* section *Anthericoides* by Terracciano (1905b) and Peterson *et al.* (2008). Stroh (1937) classified this species under *G.* section *Platyspermum*. The present results do not support Stroh's (1937) treatment of the species, and it reveals an isolated position for the species as suggested by Terracciano (1905b), Peruzzi *et al.* (2008a) and Peterson *et al.* (2008).

The second group comprises clade A (Figs 1–4), which includes species of *G.* subgenus *Hornungia* [excluding *G. pauciflora* (Turcz. ex Trautv.) Turcz. ex Ledeb.,

*G. altaica* Schischk. & Sumnev.]. All species included in clade A belong to *G.* section *Platyspermum* except *G. iranica* and *G. pauciflora*, which belong to *G.* section *Plecostigma* [according to Pascher's (1904, 1907) classification]. According to Levichev (1990), all species in this clade, apart from *G. iranica* and *G. pauciflora*, *G. bulbifera*, *G. chlorantha* and *G. exilis* (Figs 2–4), belong to *G.* section *Plecostigma*. Possession of a cymose inflorescence is a potential morphological synapomorphy for clade A.

In the analysis of the combined matrix of all datasets (Fig 3A), in addition to the grouping of *G. pauciflora* (Turcz. ex Trautv.) Turcz. ex Ledeb. and *G. altaica* Schischk. & Sumnev., which form a well-supported clade (BP 100; Fig. 3A), there are two well-defined subclades (BP 99) within clade A. The first subclade includes *G. uliginosa*, *G. afghanica* and *G. olgae*. All species of this subclade belong to *G.* section *Platyspermum* (*sensu* Pascher, 1907; Stroh, 1937; Uphof, 1958–1960) and *G.* section *Plecostigma* Pascher (*sensu* Levichev, 1990). There is little morphological similarity between the first two species; *G. uliginosa* has a single-flowered inflorescence (rarely with two flowers) and grows in moist meadows in alpine areas of north-western Iran, eastern Turkey and north-western Iraq; *G. afghanica* is a multi-flowered, cymose plant, mostly growing throughout the eastern part of Iran to Central Asia and preferring a drier habitat than *G. uliginosa*. *Gagea olgae* is morphologically similar to *G. afghanica*, with smaller tepals (6–9 mm). Cord-like roots around the bulb are a synapomorphy for *G. afghanica* and *G. olgae*. However, there is no resolution between *G. olgae* and *G. afghanica* and relatives in analyses using both nuclear and plastid sequence data, and the four accessions of *G. afghanica* and the single accession of *G. olgae* are unresolved in the strict consensus (Fig. 3A).

The second subclade comprises *G. chlorantha*, *G. iranica* and *G. wendelboi*. These species are morphologically similar. *Gagea iranica* and *G. wendelboi* are endemic species to northern and north-eastern Iran, whereas *G. chlorantha* is widely distributed through western Iran and other countries of the Middle East. Fewer taxa are included in the other analyses, but to the extent that they overlap in sampling, the same subclades are recovered in all analyses of clade A (Figs 1–4).

The next clade, B (BP 82, in Fig. 3A and BP 100, in Figs 1, 2 and 4), is moderately to strongly supported, although only two taxa are included in Figs 1, 2 and 4. An umbellate inflorescence plus a leathery bulb tunic are potential morphological synapomorphies for this clade. The species forming this clade all grow in humid areas. Relationships between members of clade B are poorly resolved in the analysis conducted using all datasets including sequences from GenBank (Fig. 3A). Clade B accessions are members of two sections, *G.* sections *Gagea* and *Monophyllos*, *sensu* Pascher (1907) Stroh (1937) and Uphof (1958–1960), compared with only one section, *G.* section *Gagea* of Davlianidze (1972), Levichev (1990) and Peterson *et al.* (2008).

Clade C is well supported in all but the combined analysis of all datasets (BPs 99–100 in Figs 1, 2 and 4). All taxa included in clade C are characterized by having a multi-flowered, umbellate inflorescence. Possession of acute to long-acuminate tepal apices is another potential synapomorphy for this group. All

taxa in clade C belong to *G.* section *Platyspermum* subsection *Reticulatae* Pascher of *G.* subgenus *Hornungia* (*sensu* Pascher, 1907; Stroh, 1937; Uphof, 1958–1960). Grossheim (1935) and Davlianidze (1976) also treated taxa of clade C as belonging to *G.* section *Platyspermum*. In contrast, Levichev (1990) classified taxa of clade C in three sections, *G.* section *Platyspermum*, *G.* section *Graminifoliae* Levichev and *G.* section *Incrustatae* Levichev, but support for this in the combined analysis of all data is weak (BP < 50), and all taxa collapse in the strict consensus tree (Fig. 3B). *Gagea* section *Platyspermum* (*sensu* Pascher, 1907) is characterized by having a weakly trilobed stigma and flattened seeds.

*Gagea bulbifera*, sister to the rest of clade C in the analysis of the ITS alone (BP 100, Fig. 1), is usually a single-flowered species. However, in some cases multi-flowered stems have been observed in the field (M. Zarrei, pers. obs.). It was placed in *Gagea* section *Plecostigma* by Levichev (1990). Peterson *et al.* (2008) referred *G. bulbifera* to a new unpublished *G.* section *Bulbiferae* based on possession of a few-flowered, paniculate inflorescence.

Although the accessions are mostly unresolved in the combined analysis of all data (Fig 3B), some well-supported monophyletic groups, usually including multiple accessions of one species, are recognizable within clade C. As shown in Fig. 4, *G. alexeenkoana* Misch. and *G. caroli-kochii* Grossh. form a moderately supported clade (BP 86), and they are morphologically similar taxa. *Gagea caroli-kochii* is more slender and smaller than *G. alexeenkoana* and possesses a narrower basal leaf and shorter, narrower tepals. In contrast to our accessions of *G. alexeenkoana*, *G. alexeenkoana* from GenBank formed a clade with accessions of *G. reticulata sensu lato* (*s.l.*) (Fig. 3B), and this accession might be just a robust form of *G. reticulata* (Pall.) Schult. & Schult.f., a morphologically polymorphic species. *Gagea reticulata s.l.* accessions form a clade with strong BP support (Figs 1, 2 and 4; BP > 97). This species can be recognized by its long, reticulate, multi-layered neck, single to multi-flowered umbellate inflorescence and tepals with long-acuminate apices. However, it is a polymorphic species with regards to morphological features, and different forms have been designated as distinct species by many authors. Clumped forms with a circinate, narrowly linear basal leaf are recognized as *G. tenuifolia* (Boiss.) Fomin (our accessions 23287, 23174 and 23284), solitary plants with a straight, linear basal leaf as *G. reticulata sensu stricto* (*s.s.*) (23150), and forms with a shorter bulb neck, broader basal leaf and tepals are recognized as *G. tehranica* Gand. (not included in the present study). Although lacking support, an accession of *Gagea helicophylla* Levichev from GenBank is also positioned in the *G. reticulata* group (Fig. 3B). Although *G. reticulata s.l.* accessions fall into two weakly supported groups (BP approx. 64; Figs 2 and 4), these clades do not appear to us to be referable to any named taxa.

*Gagea setifolia s.l.* accessions are dispersed throughout clade C. This species, like *G. reticulata*, shows considerable morphological variation (Peruzzi and Zarrei, 2007), and many forms have been designated as species by some authors (e.g. *G. anonyma* Rech f. and *G. perpusilla* Pascher). In analyses of the *G. setifolia* complex, there is thus support for recognition of some forms that grow in similar ecological

conditions. *Gagea setifolia* 23272 (from the *locus classicus* of *G. anonyma*) and *G. setifolia* 23175 collected from fine sand habitats form a strongly supported group in all analyses (BPs 90–100); this group corresponds to *G. anonyma*. *Gagea setifolia* 23291 and 23267 share the same habit as 23272, but they are slightly more robust and grow in soils of coarse sand. These two samples, determined as *G. setifolia* s.s., also form a monophyletic group in analyses including new plastid data and combined datasets (BPs 77 and 86 in Figs 2 and 4, respectively). However, there is no support for this group in the ITS analysis (Fig. 1). The two accessions of *G. cf. setifolia* (23286 and 23292) that are morphologically similar to *G. setifolia* s.s. but differ from it in having broader bracts and a longer-necked tunic fall outside the main *G. setifolia* clade (Fig. 4). *Gagea bergii* Litv. also groups with *G. setifolia* s.l., but it is morphologically distinct from it. It has a short peduncle and long pedicels with a long-villous indumentum. *Gagea vegeta* and *G. commutata* K.Koch are morphologically similar and form a clade in the plastid and plastid plus ITS analyses (BPs 56 and 64 in Figs 2 and 4, respectively). *Gagea vegeta* is the only species of *G. section Graminifoliae* (*sensu* Levichev, 1990) included in this analysis. The next species nested in clade C is *G. circumplexa* Vved. Levichev (1990) placed this species in a separate section, *G. section Incrustatae*, the only species of this section included in the present analyses, but other authors have classified it in *G. section Platyspermum* of *G. subgenus Hornungia*. *Gagea circumplexa* falls towards the basal nodes of clade C (Figs 2 and 4), but its position is not well supported.

The last monophyletic group within *Gagea* is clade D (BPs 87–99; Figs 1–4). The presence of a leathery, dark-grey to dark-brown tunic is a potential morphological synapomorphy for this clade. Although clade D includes several moderately to well-supported clades, the deeper nodes are unresolved. Species included in clade D belong to *G. sections Didymobolbos* and *Monophyllos* of *G. subgenus Gagea* and *G. section Platyspermum* of *G. subgenus Hornungia* (Fig. 3B). Three subclades include members of *G. subgenus Hornungia* (labelled as section *Platyspermum* in Figs 1–5), i.e. *G. gaeoides* (Zucc.) Vved., the clade from *G. libanotica* to *G. chomutovae* and the grouping from *G. tenera* 23281 to *G. stipitata* 23154. Clade D also includes a well-supported grouping of *G. granulosa* Gb to *G. confusa* Gb 23137, which are morphologically similar, sharing a flattened basal leaf and umbellate to subumbellate inflorescences (Fig. 3B). All of these species belong to *G. section Monophyllos* subsection *Minimae* Pascher, later promoted to sectional rank by Davlianidze (1976; *G. section Minimae* (Pascher) Davlianidze).

The grouping from *Gagea tenera* 23281 to *G. dschungarica* 23143 is a well-supported group (BP 99) within clade D based on combined analysis of all datasets (Fig. 3B). To the extent that there is overlap in sampling, this group is recovered in all analyses (Figs 1–4). *Gagea dschungarica* Regel (*G. section Monophyllos* subsection *Minimae*) is morphologically distinct relative to the rest of the members of this group, which are all members of *G. section Platyspermum* subsection *Stipitatae* Pascher (*G. section Stipitatae sensu* Davlianidze, 1976; Levichev, 1990). *Gagea dschungarica* has recently been placed in a new *G. section Dschungaricae* Levichev (Peterson *et al.*, 2008). However, we do not believe that creating a new

section for a taxon that is sister to the rest of the clade enhances systematic understanding. The next group within clade D includes *Gagea caelestis* GB–*Gagea bohemica*, which is weakly supported (BP 63; Fig. 3B). This group includes representatives from three sections, *G. section Platyspermum*, *Monophyllos* and *Didymobolbos*, and is recovered in all analyses. The production of bulbils in the axil of the lower cauline leaf is a potential synapomorphy for a group comprising *G. tenera* and species such as *G. villosa* and *G. fragifera* (Vill.) E. Bayer & G. López.

All accessions of *G. bohemica* form a group with <50% bootstrap support. All accessions of *G. villosa* form a moderately supported clade (BP 79; Fig. 3B). *Gagea fragifera*, *G. luteoides* Stapf and *G. glacialis* K.Koch (all belong to *G. section Monophyllos*) form a clade with moderate support (BP 73; Fig. 3B).

In the analysis conducted using only newly generated sequences, *G. fragifera*, *G. luteoides* and *G. glacialis*, together with *G. villosa* accessions and other morphologically similar species, form a strongly supported group (BPs 85–100; see Figs 1, 2 and 4). These species share a hollow basal leaf and umbellate to sub-umbellate inflorescence; they usually grow in heavy clay soils. The differences between them are so slight that it is difficult to separate them, particularly in the case of herbarium material. *Gagea glacialis* and *G. fragifera*, for example, are distinguished on the basis of tepal length (less than or more than 12 mm, respectively) and number of flowers per inflorescence. *Gagea glacialis* usually has fewer flowers (mostly one and rarely up to three), whereas *G. fragifera* has more than three flowers. The monotypic subsect. *Luteoides* (*G. luteoides*) of Pascher, which was not recognized by later authors, needs to be included in *G. section Monophyllos*. The species composition of clade D is compatible with neither Pascher's (1907) nor Levichev's (1990 and in Peterson *et al.*, 2008) classification.

## CONCLUSIONS

The present analyses support the collective monophyly of *Gagea* and *Lloydia* – they are clearly a single taxon. They provide a basis for a new classification of *Gagea* that is supported by some previously unused morphological features. Incongruence between the plastid and nuclear ITS results is interpreted as potentially due to ancient hybridization and/or paralogy of ITS rDNA. To resolve the trees, particularly along the spine of the tree and also within closely related species complexes, we will need to conduct additional analyses using more variable, low-copy nuclear genes. Such genes are not subject to concerted evolution and generally show higher evolutionary rates, which make them better tools to understand species relationships when levels of variation in plastid markers and nuclear ribosomal ITS are too low to resolve relationships and hybridization/paralogy prevent clear assessments of patterns of species evolution.

## SUPPLEMENTARY DATA

The original version of this manuscript as submitted by the authors to *Annals of Botany* on 3 January 2007 is available as Supplementary Data online at [www.aob.oxfordjournals.org](http://www.aob.oxfordjournals.org).

## ACKNOWLEDGMENTS

We would like to thank the Stanley Smith Horticultural Trust, Norman Scarfe Trust, Faith Raven and Paul Miles for their financial support. Thanks also to Martyn Rix for his support. Thanks to Laura Kelly for critical reading of the manuscript. At RBG, Kew, the work could not have been completed without the help of Martyn Powell, Ben Davis, Imalka Kahandawala, Maria Vorontsova, Laszlo Csiba, Dion Devey, Jim Clarkson, Rhian Smith, Ilia Leitch, Félix Forest and Lola Lledó. At the Shahed University of Tehran, we thank Iraj Rasooli, Dean of the Faculty of Science, for his valuable support. Asghar Kamrani, Taiebeh Radjabian and Amir Habibi helped in collecting material. We also thank Amots Dafni for providing additional plant materials. We wish to thank Lorenzo Peruzzi and other anonymous reviewers for their helpful comments on the manuscript. The constructive comments of Jeannette Whitton are gratefully acknowledged.

## LITERATURE CITED

- Ali SI. 2006. Two new species of *Gagea* Salisb. (Liliaceae) from Pakistan. *Pakistan Journal of Botany* 38: 43–46.
- Álvarez I, Wendel JF. 2003. Ribosomal ITS sequences and plant phylogenetic inference. *Molecular Phylogenetics and Evolution* 29: 417–434.
- Baldwin BG, Sanderson MJ, Porter JM, Wojciechowski MF, Campbell CS, Donoghue MJ. 1995. The ITS region of nuclear ribosomal DNA: a valuable source of evidence on angiosperm phylogeny. *Annals of the Missouri Botanical Garden* 82: 247–277.
- Bohdanowicz J, Lewandowska B. 1999. Participation of endoplasmic reticulum in the unequal distribution of plastids during generative cell formation in *Gagea lutea* (L.) Ker-Gawl. (Liliaceae). *Acta Biologica Cracoviensia Series Botanica* 41: 77–183.
- Boissier E. 1882. *Gagea*. In: *Flora Orientalis* 5. Geneva and Basel, 203–211.
- Cameron KM, Chase MW, Anderson WR, Hills HG. 2001. Molecular systematics of Malpighiaceae: evidence from plastid *rbcL* and *matK* sequences. *American Journal of Botany* 88: 1847–1862.
- Chase MW, Knapp S, Cox AV, et al.. 2003. Molecular systematics, GISH and the origin of hybrid taxa in *Nicotiana* (Solanaceae). *Annals of Botany* 92: 107–127.
- Dasgupta S, Deb DB. 1983. Taxonomic revision of the genus *Gagea* Salisb. (Liliaceae) in India and adjoining regions. *The Journal of the Bombay Natural History Society* 83: 78–97.
- Dasgupta S, Deb DB. 1986. Taxonomic revision of the genus *Lloydia* (Liliaceae) in India and adjoining region. *Indian Journal of Forestry* 9: 104–112.
- Davlianidze MT. 1972. Conspectus of the Caucasian representatives of the genus *Gagea* Salisb. I. *Notulae Systematicae ac Geographicae. Instituti Botanici Tbilisiensis* 29: 69–75.
- Davlianidze MT. 1976. Kavkazaskie predstaviteli roda *Gagea* Salisb. Tbilisi: Metsniereba, 1–160 [In English translation entitled 'A review of the systematics and the taxonomy of the Caucasian representatives of the genus *Gagea* Salisb.'].
- Doyle JJ. 1992. Gene trees and species trees: molecular systematics as one-character taxonomy. *Systematic Botany* 71: 144–163.
- Doyle JJ, Doyle JL. 1987. A rapid DNA isolation procedure from small quantities of fresh leaf tissue. *Phytochemical Bulletin* 19: 11–15.
- Farris JS, Kjällersjö M, Kluge AG, Bult C. 1995. Testing significance of incongruence. *Cladistics* 10: 315–319.
- Fay MF, Chase MW. 2000. Modern concepts of Liliaceae with a focus on the relationship of *Fritillaria*. *Curtis's Botanical Magazine* 17: 146–149.
- Federov A. 2001. *Flora of Russia, the European Part and Bordering Regions*, Vol. 4, Magnoliophyta (=Angiospermae), Magnoliopsida (=Dicotyledones), Liliopsida (=Monocotyledones). CRC Press Inc.
- Feinburn-Dotham N. 1986. *Gagea*. In: Zohary M. ed. *Flora Palaestina*, Vol. 4. Jerusalem: The Israel Academy of Science and Humanities, 32–39.
- Felsenstein J. 1985. Confidence limits on phylogenies: an approach using the bootstrap. *Evolution* 39: 783–791.
- Fitch WM. 1971. Towards defining the course of evolution: minimum change for a specific tree topology. *Systematic Zoology* 20: 406–426.
- Gerard J. 1663. *The herbal of general history of plants*. New York: Dover Publications (Reprint).
- Govaerts R. 2006. *World checklist of Liliaceae*. Kew: The Board of Trustees of the Royal Botanic Gardens. <http://www.kew.org/wcsp/> accessed October 2008.
- Greuter W. 1970. The taxonomic position of *Lloydia graeca* (Liliaceae) and related species. *Israel Journal of Botany* 19: 155–160.
- Grossheim AA. 1935. *Gagea*. In: Komarov VL, ed. *Fl. USSR*, 4. Leningrad, 61–112 (English ed. Jerusalem: Israel Program for Scientific Translation Ltd, 1968).
- Grubov VI, Egorova TV. 2003. *Gagea*. In: Grubov VI, ed. *Plants of Central Asia*, Vol. 7, Liliaceae–Orchidaceae. Science Publishers, Inc., 10–17.
- Hamzaoglu E, Budak Ü, Aksoy A. 2008. A new species of *Gagea* Salisb. (Liliaceae) from Sivas (Central Anatolia, Turkey). *Turkish Journal of Botany* 32: 261–264.
- Heyn CH, Dafni A. 1971. Studies in the genus *Gagea* (Liliaceae) I. The platyspermous species in Israel and neighbouring areas. *Israel Journal of Botany* 20: 214–233.
- Heyn CH, Dafni A. 1977. Studies in the genus *Gagea* (Liliaceae) II, The non-platyspermous species from the Galilee, the Golan Heights and Mt. Hermon. *Israel Journal of Botany* 26: 11–22.
- Henker H. 2005. Goldsterne und Stinsenpflanzen in Mecklenburg-Vorpommern. Teil 1. Die Goldsterne von Mecklenburg-Vorpommern unter besonderer Berücksichtigung kritischer und neuer Sippen. *Botanischer Rundbrief für Mecklenburg-Vorpommern* 39: 3–90.
- Hulsenbeck JF, Bull JJ, Cunningham CW. 1996. Combining data in phylogenetic analysis. *Trends in Ecology and Evolution* 11: 152–158.
- Hyam R, Pankhurst R. 1995. *Plants and their names, a concise dictionary*. Oxford University Press.
- Kelchner SA. 2000. The evolution of non-coding chloroplast DNA and its application in plant systematics. *Annals of the Missouri Botanical Garden* 87: 482–498.
- Koch K. 1849. Beiträge zu einer Flora des Orientes (Fortsetzung): *Gagea*. *Linnaea* 22: 226–231.
- Johnson LA, Soltis DE. 1994. *matK* DNA sequences and phylogenetic reconstruction in Saxifragaceae s.str. *Systematic Botany* 19: 143–156.
- Jordan WC, Courtney MW, Neigle JE. 1996. Low levels of intraspecific genetic variation at a rapidly evolving chloroplast DNA locus in North American duckweeds (Lemnaceae). *American Journal of Botany* 83: 430–439.
- Kosenko VN. 1999. Contribution to the pollen morphology and taxonomy of Liliaceae. *Grana* 38: 20–30.
- Kosenko VN, Levichev IG. 1988. Pollen morphology in the genera *Gagea* and *Lloydia* (Liliaceae). *Botanicheskii Zhurnal* 73: 965–976.
- Levichev IG. 1981. The new species of the genus *Gagea* (Liliaceae) from the western Tian-Shan (in Russian). *Botanicheskii Zhurnal* 66: 1635–1645.
- Levichev IG. 1988. New species of the genus *Gagea* (Liliaceae) from western part of Tian-Shan (in Russian). *Botanicheskii Zhurnal* 73: 1617–1623.
- Levichev IG. 1990. The synopsis of the genus *Gagea* (Liliaceae) from the western Tien-Shan. (in Russian). *Botanicheskii Zhurnal* 75: 225–234.
- Levichev IG. 1991. The new species of the genus *Gagea* (Liliaceae) from the western Tian-Shan. *Botanicheskii Zhurnal* 76: 999–1004 (in Russian).
- Levichev IG. 1999. Zur Morphologie in der Gattung *Gagea* Salisb. (Liliaceae). I. Die unterirdischen Organe. *Flora* 194: 379–392.
- Levichev IG. 2000. A new species of the genus *Gagea* (Liliaceae). *Botanicheskii Zhurnal* 85: 125–127.
- Levichev IG. 2001. New species of the genus *Gagea* (Liliaceae) from western district of Asia. *Turczaninowia* 4: 5–35.
- Levichev IG. 2006a. Four new species of the genus *Gagea* Salisb. (Liliaceae) from Western Himalayas and the adjoining regions. *Pakistan Journal of Botany* 38: 47–54.
- Levichev IG. 2006b. A review of the *Gagea* (Liliaceae) species in the flora of Caucasus. *Botanicheskii Zhurnal* 91: 917–951.
- Levichev IG, Ali SI. 2006. Seven new species of the genus *Gagea* Salisb. (Liliaceae) from Western Himalayas and the adjoining regions. *Pakistan Journal of Botany* 38: 55–62.
- Levichev IG, Navruzshoev D. 1997. A new species of the genus *Gagea* (Liliaceae) from the Pamiro-Alayi. *Botanicheskii Zhurnal* 82: 91–92.
- Linnaeus C. 1753. *Species Plantarum*. 2. Stockholm.

- Linnaeus C. 1762.** *Species Plantarum*. 2 (7). Stockholm.
- Mabberley DJ. 1997.** *The plant book*. Cambridge: Cambridge University Press.
- McNeill J, Barrie FR, Burdet HM, et al. (eds) 2006.** *International Code of Botanical Nomenclature* (Vienna Code) adopted by the Seventeenth International Botanical Congress Vienna, Austria, July 2005. Ruggell, Liechtenstein: Gantner Verla.
- Melchior H. 1964.** Reihe Liliiflorae. In: Melchior H, ed. *A. Engler's Syllabus der Pflanzenfamilien*, 12. Aufl., 2. Band. Berlin: Nikolasssee, 513–542.
- Molvray MP, Kores PJ, Chase MW. 2000.** Polyphyly of mycoheterotrophic orchids and functional influence on floral and molecular characters. In: Wilson KL, Morrison DA, eds. *Monocots: systematics and evolution*. Melbourne: CSIRO, 441–448.
- Pallas PS. 1773.** *Reise Durch verich Ledene provinzen des Russischen*. 2. St. Petersburg.
- Pallas PS. 1776.** *Reise des Russischen Reichs: Reise aus Sibirien zuruch an die Wolga*. 3. St. Petersburg.
- Pascher A. 1904.** Übersicht über die Arten der Gattung *Gagea*. *Sitzungsberichte des deutschen naturwissenschaftlich-medischen Vereins für Böhmen 'Lotos'*: 109–131.
- Pascher A. 1907.** Conspectus *Gagearum* Asiae. *Bulletin of the de la Societe Imperiale des Naturalistes de Moscou* 19: 353–375.
- Patterson TB, Givnish TJ. 2002.** Phylogeny, concerted convergence, and phylogenetic niche conservatism in the core Liliales: insights from *rbcL* and *ndhF* sequence data. *Evolution* 56: 233–252.
- Peruzzi L. 2003.** Contribution to cytotaxonomical knowledge of *Gagea* Salisb. (Liliaceae). sect. *Foliatae* A. Terrac. and synthesis of karyological data. *Caryologia* 56: 115–128.
- Peruzzi L. 2008.** Contribution to the cytotaxonomical knowledge of the genus *Gagea* Salisb. (Liliaceae). III. New karyological data from the central Mediterranean area. *Caryologia* 61: 92–106.
- Peruzzi L, Aquaro G. 2005.** Contribution to cytotaxonomical knowledge of *Gagea* Salisb. (Liliaceae). II. Further karyological studies on Italian populations. *Candollea* 60: 237–253.
- Peruzzi L, Zarrei M. 2007.** Typification some critical taxa of *Gagea* Salisb. (Liliaceae) from W Asia. *Candollea* 62: 237–244.
- Peruzzi L, Bartolucci F, Frignani F, Minutillo F. 2007.** *G. tisoniana*, a new species of *Gagea* Salisb. sect. *Gagea* (Liliaceae) from Central Italy. *Botanical Journal of the Linnean Society* 153: 337–347.
- Peruzzi L, Tison J-M, Peterson A, Peterson J. 2008a.** On the phylogenetic position and taxonomic value of *Gagea trinervia* (Viv.) Greuter and the whole *G.* sect. *Anthericoides* A. Terracc. (Liliaceae). *Taxon* 57: 1201–1214.
- Peruzzi L, Peterson A, Tison J-M, Peterson J. 2008b.** Phylogenetic relationships of *Gagea* Salisb. (Liliaceae) in Italy, inferred from molecular and morphological data matrices. *Plant Systematics and Evolution* 276: 219–234.
- Peterson A, Peterson J. 2005.** Phylogenetic relationships among *Gagea* and *Lloydia* (Liliaceae). Abstract, in *17th International Botanical Congress*, Vienna, Austria, p. 389.
- Peterson A, Peterson J. 2006.** Molecular analysis of phylogenetic relationships among *Gagea* and *Lloydia* (Liliaceae). Abstract, in International Botanical Conference, California State University, p. 248.
- Peterson A, John H, Koch E, Peterson J. 2004.** A molecular phylogeny of the genus *Gagea* (Liliaceae) in Germany inferred from non-coding chloroplast and nuclear DNA sequences. *Plant Systematics and Evolution* 245: 145–162.
- Peterson A, Levichev IG, Peterson J. 2008.** Systematics of *Gagea* and *Lloydia* (Liliaceae) and infrageneric classification of *Gagea* based on molecular and morphological data. *Molecular Phylogenetics and Evolution* 46: 446–465.
- Phillips R, Rix M. 1989.** *Bulbs. The Pan garden plants series*. London: Pan.
- Reeves G, Chase MW, Goldblatt P, et al.. 2001.** Molecular systematics of Iridaceae: evidence from four plastid DNA regions. *American Journal of Botany* 88: 2074–2087.
- Rechinger KH. 1986.** Six new species of *Gagea* (Liliaceae) from *Flora Iranica* area. *Plant Systematics and Evolution* 153: 287–292.
- Rønsted N, Law S, Thornton H, Fay MF, Chase MW. 2005.** Molecular phylogenetic evidence for the monophyly of *Fritillaria* and *Lilium* (Liliaceae, Liliales) and the infrageneric classification of *Fritillaria*. *Molecular Phylogenetics and Evolution* 35: 509–527.
- Salisbury RA. 1806.** On the characters of a distinct genus hitherto confounded with *Ornithogalum*, and called *Gagea*; with some remarks on the importance of the inflorescence in distinguishing genera. *Annals of Botany* 2: 553–557.
- Sang T, Crawford DJ, Stuessy TF. 1997.** Chloroplast DNA phylogeny, reticulate evolution, and biogeography of *Paeonia* (Paeoniaceae). *American Journal of Botany* 84: 1120–1136.
- Stroh G. 1937.** Die Gattung *Gagea* Salisb. *Beihefte zum Botanischen Centralblatt* 57: 485–520.
- Sun H, McLewin W, Fay MF. 2001.** Molecular phylogeny of *Helleborus* (Ranunculaceae), with an emphasis on the East Asian-Mediterranean disjunction. *Taxon* 50: 1001–1018.
- Sun Y, Skinner DZ, Liang GH, Hulbert SH. 1994.** Phylogenetic analysis of *Sorghum* and related taxa using internal transcribed spacer of nuclear ribosomal DNA. *Theoretical and Applied Genetics* 89: 26–32.
- Swofford DL. 2002.** *PAUP\*: phylogenetic analysis using parsimony (\*and other methods)*, Version 4. Sunderland, MA: Sinauer Associates.
- Taberlet P, Gielly L, Pautou G, Bouvet J. 1991.** Universal primers for amplification of three non-coding regions of chloroplast DNA. *Plant Molecular Biology* 17: 1105–1109.
- Takhtajan A. 1986.** *Florestic regions of the world*. Berkeley: University of California Press.
- Tate JA, Simpson BB. 2003.** Paraphyly of *Tarasa* (Malvaceae) and diverse origins of the polyploid species. *Systematic Botany* 28: 723–737.
- Terracciano A. 1905a.** *Gagearum* species *Florae Orientalis*. *Bulletin de l'herbier Boissier* 2: 1061–1076; 1113–1128.
- Terracciano A. 1905b.** Les espèces du genre *Gagea* dans la flore del l'Afrique boréale. *Bulletin de la Societe Botanique de France* 52: 1–26.
- Terracciano A. 1906.** *Gagearum* species *Florae Orientalis*. *Bulletin de l'herbier Boissier* 2: 105–120.
- Tison JM. 2004.** *Gagea polidorii* J.-M. Tison, espèce méconnue du sud-ouest des Alpes et des Apennins. *Acta Botanica Gallica* 15: 319–326.
- Uphof JC. 1958–1960.** A review of the genus *Gagea* Salisb. I–III. *Plant Life* 14: 124–132, 151–161; 15: 163–176.
- Wendel JF, Schnabel A, Seelanan T. 1995.** An unusual ribosomal DNA sequence from *Gossypium gossypoides* reveals ancient, cryptic, intergenomic introgression. *Molecular Phylogenetics and Evolution* 4: 298–313.
- Wendelbo P, Rechinger KH. 1990.** *Gagea*. In: Rechinger KH, ed. *Flora Iranica*, Vol. 165. Graz, Austria: Akademische Druck- und Verlagsanstalt, 13–57.
- White TJ, Bruns T, Lee S, Taylor J. 1990.** Amplification and direct sequencing of fungal ribosomal RNA genes for phylogenetics. In: Innis MA, Gelfand DH, Sninsky JJ, White TJ, eds. *PCR protocols: a guide to methods and applications*. San Diego: Academic Press, 315–322.
- Whitten WM, Williams NH, Chase MW. 2000.** Subtribal and genetic relationships of Maxillariaceae (Orchidaceae) with emphasis on Stanhopeinae: combined molecular evidence. *American Journal of Botany* 87: 1842–1856.
- Willis JC. 1980.** *A dictionary of the flowering plants and ferns*. Cambridge: Cambridge University Press.
- Winship PR. 1989.** An improved method for directly sequencing PCR amplified material using dimethyl sulphoxide. *Nucleic Acids Research* 17: 1266.
- Yoder AD, Irwin JA, Payseur BA. 2001.** Failure of the ILD to determine data combinability for slow loris phylogeny. *Systematic Biology* 50: 408–424.
- Zarrei M, Zarrei Sh. 2005a.** A new species of *Gagea* (Liliaceae) from Iran. *Nordic Journal of Botany* 23: 269–274.
- Zarrei M, Zarrei Sh. 2005b.** Pollen morphology of the genus *Gagea* (Liliaceae) in Iran. *Flora* 200: 96–108.
- Zarrei M, Zarrei Sh, Wilkin P, Rix M. 2007.** Systematic revision of the genus *Gagea* Salisb. (Liliaceae) in Iran. *Botanical Journal of the Linnean Society* 154: 559–588.
- Zhao LQ, Yang J. 2006.** *Gagea daqingshanensis* (Liliaceae), a new species from inner Mongolia, China. *Annales Botanici Fennici* 43: 223–224.
- Zhao YZ, Zhao LQ. 2004.** *Gagea chinensis* (Liliaceae), a new species from inner Mongolia, China. *Annales Botanici Fennici* 41: 297–298.

## APPENDIX

Sources of DNA for taxa included in this study (RBG Kew DNA Bank numbers are in parentheses after voucher information) and GenBank accession numbers for sequences generated in this research and by others

| Taxa                                                                                | Voucher information                       | ITS      | matK     | psbA-trnH | rpl16    | trnL-trnF region |
|-------------------------------------------------------------------------------------|-------------------------------------------|----------|----------|-----------|----------|------------------|
| <i>Gagea</i> subgenus <i>Gagea</i> : <i>Gagea</i> sect. <i>Didymobolbos</i> K. Koch |                                           |          |          |           |          |                  |
| <i>Gagea bohémica</i> (Zauschn.) Schult. & Schult. f.                               | Andy Jones s.n. (Kew 7952)                | –        | EU912103 | –         | EU912175 | EU912253         |
| <i>Gagea bohémica</i> (Zauschn.) Schult. & Schult. f.                               | Germany: Saxony-Anhalt                    | –        | –        | –         | –        | AJ437197         |
| <i>Gagea bohémica</i> (Zauschn.) Schult. & Schult. f.                               | Levichev 50 (LE)                          | AM162672 | –        | AM085142  | –        | AJ969117         |
| <i>Gagea bohémica</i> subsp. <i>bohémica</i>                                        | Czech Republic: Moravia                   | AJ427549 | –        | AJ416370  | –        | AJ419161         |
| <i>Gagea bohémica</i> subsp. <i>bohémica</i>                                        | Germany: Saxony-Anhalt                    | AJ427548 | –        | –         | –        | AJ419160         |
| <i>Gagea bohémica</i> subsp. <i>saxatilis</i> (Mert. & W.D.J.Koch) Asch. & Graebn   | Germany: Saxony-Anhalt                    | AJ427547 | –        | AJ416371  | –        | AJ419159         |
| <i>Gagea algeriensis</i> Chabert                                                    | Chase 748 (K)(Kew 748)                    | EU912088 | AY624470 | EU939280  | EU912232 | EU912311         |
| <i>Gagea foliosa</i> (J.Presl & C.Presl) Schult. & Schult.f                         | Italy: Sardegna 34697 (Z)                 | AM162676 | –        | AM049258  | –        | AJ969124         |
| <i>Gagea heldreichii</i> (A.Terracc.) Stroh                                         | Levichev 8 (LE)                           | AM265534 | –        | AM161464  | –        | AM180467         |
| <i>Gagea lojaconoi</i> Peruzzi                                                      | Italy 9256 (CLU)                          | AM287272 | –        | AM282997  | –        | AM283106         |
| <i>Gagea peduncularis</i> (J.Presl & C.Presl) Pascher                               | Davis 40349 (K)(Kew 23333)                | EU912054 | EU912127 | EU939252  | EU912204 | EU912283         |
| <i>Gagea soleirolii</i> F.W.Schultz                                                 | Montserrat <i>et al.</i> s.n. (Kew 20651) | –        | EU912166 | EU939297  | EU912244 | EU912330         |
| <i>Gagea villosa</i> (M.Bieb.) Sweet                                                | Zarrei & Kamrani 35273 (TUH)(Kew 23178)   | EU912084 | EU912151 | EU939276  | EU912228 | EU912307         |
| <i>Gagea villosa</i> (M.Bieb.) Sweet                                                | Zarrei & Golzarian 35247 (TUH)(Kew 23179) | EU912085 | EU912152 | EU939277  | EU912229 | EU912308         |
| <i>Gagea villosa</i> (M.Bieb.) Sweet                                                | Zarrei & Golzarian 35253 (TUH)(Kew 23295) | EU912087 | EU912154 | EU939279  | EU912231 | EU912310         |
| <i>Gagea villosa</i> (M.Bieb.) Sweet                                                | Levichev 7 (LE)                           | AM180453 | –        | AJ973170  | –        | AM238538         |
| <i>Gagea villosa</i> (M.Bieb.) Sweet                                                | Germany: Saxony-Anhalt                    | AJ427545 | –        | AJ416373  | –        | AJ419163         |
| <i>Gagea</i> sect. <i>Monophyllos</i> Pascher                                       |                                           |          |          |           |          |                  |
| <i>Gagea caelestis</i> Levichev                                                     | Levichev 44 (LE)                          | AM180456 | –        | AJ973165  | –        | AJ969118         |
| <i>Gagea confusa</i> A.Terracc.                                                     | TUH-E BOT.EXP. 35712 (TUH)(Kew 23169)     | EU912041 | EU912117 | EU939239  | EU912189 | EU912268         |
| <i>Gagea confusa</i> A.Terracc.                                                     | Zarrei & Zarrei 35266 (TUH)(Kew 23137)    | EU912040 | EU912116 | EU939238  | EU912188 | EU912267         |
| <i>Gagea confusa</i> A.Terracc.                                                     | Levichev 13 (LE)                          | AM087949 | –        | AJ973173  | –        | AJ890369         |
| <i>Gagea dschungarica</i> Regel                                                     | Zarrei 35815 (TUH)(Kew 23143)             | EU912043 | EU912118 | EU939240  | EU912191 | EU912270         |
| <i>Gagea dschungarica</i> Regel                                                     | Zarrei 35290 (TUH)(Kew 23170)             | EU912044 | EU912119 | EU939241  | EU912192 | EU912271         |
| <i>Gagea dschungarica</i> Regel                                                     | Levichev 14 (LE)                          | AM087952 | –        | AJ973164  | –        | AJ970175         |
| <i>Gagea filiformis</i> (Ledeb.) Kunth                                              | Levichev 12 (LE)                          | AM180457 | –        | AM161459  | –        | AM084904         |
| <i>Gagea fragifera</i> (Vill.) E.Bayer & G.López                                    | Zarrei 35820 (TUH)(Kew 23144)             | EU912045 | EU912120 | EU939243  | EU912194 | EU912273         |
| <i>Gagea fragifera</i> (Vill.) E.Bayer & G.López                                    | TUH-E BOT.EXP. 35711 (TUH)(Kew 23171)     | EU912046 | EU912121 | EU939244  | EU912195 | EU912274         |
| <i>Gagea fragifera</i> (Vill.) E.Bayer & G.López                                    | TUH-E BOT.EXP. 35307 (TUH)(Kew 23294)     | EU912086 | EU912153 | EU939278  | EU912230 | EU912309         |
| <i>Gagea fragifera</i> (Vill.) E.Bayer & G.López                                    | Zarrei & Zarrei 35265 (K, TUH)(Kew 23296) | EU912047 | EU912122 | EU939245  | EU912196 | EU912275         |
| <i>Gagea fragifera</i> (Vill.) E.Bayer & G.López                                    | Italy: 12692 (CLU)                        | AM287285 | –        | AM282995  | –        | AM283102         |
| <i>Gagea fragifera</i> (Vill.) E.Bayer & G.López                                    | Switzerland: Canton Graubunden 10726 (ZT) | –        | –        | AM238531  | –        | AJ890375         |
| <i>Gagea fragifera</i> (Vill.) E.Bayer & G.López                                    | Bulgaria: Pirin-mountains 070407 (HAL)    | AM162677 | –        | AJ973158  | –        | AJ890368         |
| <i>Gagea fragifera</i> (Vill.) E.Bayer & G.López                                    | Levichev 29b (LE)                         | AM180455 | –        | AM238521  | –        | AM161467         |
| <i>Gagea glacialis</i> K.Koch                                                       | Marais 1565 (K)(Kew 23279)                | –        | –        | –         | EU912199 | EU912278         |
| <i>Gagea granulosa</i> Turcz.                                                       | Levichev 11b (LE)                         | AM287278 | –        | AM238517  | –        | AM180463         |
| <i>Gagea granulosa</i> Turcz.                                                       | Levichev 11a (LE)                         | AM265533 | –        | AM238518  | –        | AM180462         |
| <i>Gagea hiensis</i> Pascher                                                        | Mongolia: Bogd-Ul Mountains 070426 (HAL)  | AM287279 | –        | AJ973169  | –        | AJ890367         |
| <i>Gagea infrakamensis</i> Levichev                                                 | Levichev 10 (LE)                          | AM180459 | –        | AM238519  | –        | AM180471         |
| <i>Gagea luteoides</i> Stapf                                                        | Baytor, T. ISTE 44270 (K)(Kew 23280)      | EU912053 | EU912126 | EU939251  | EU912203 | EU912282         |
| <i>Gagea minima</i> (L.) Ker-Gawl.                                                  | Germany: Saxony-Anhalt                    | AJ427546 | –        | AJ416374  | –        | AJ419164         |
| <i>Gagea spathacea</i> (Hayne) Salisb.                                              | Levichev 37 (LE)                          | –        | –        | AJ973174  | –        | AJ969126         |
| <i>Gagea spathacea</i> (Hayne) Salisb.                                              | Germany: Saxony-Anhalt 095844 (Hal)       | AJ427541 | –        | AJ416369  | –        | AJ419166         |
| <i>Gagea</i> sect. <i>Gagea</i> ( <i>Holobolbos</i> K.Koch)                         |                                           |          |          |           |          |                  |
| <i>Gagea aipetriensis</i> Levichev                                                  | Levichev 15 (LE)                          | AM087955 | –        | AM049259  | –        | AJ970178         |
| <i>Gagea capusii</i> A.Terracc.                                                     | Levichev 24 (LE)                          | –        | –        | AM085143  | –        | AJ969123         |
| <i>Gagea chanae</i> Grossh.                                                         | Zarrei 867 (K)(Kew 23270)                 | EU912082 | EU912167 | EU939298  | EU912245 | –                |
| <i>Gagea helenae</i> Grossh.                                                        | Levichev 22 (LE)                          | AM265531 | –        | AM161461  | –        | AJ969120         |
| <i>Gagea lutea</i> (L.) Ker-Gawl.                                                   | Zarrei 35285 (TUH)(Kew 23148)             | EU912052 | EU912125 | EU939250  | EU912202 | EU912281         |



|                                                                                                        |                                                                  |          |          |          |          |          |
|--------------------------------------------------------------------------------------------------------|------------------------------------------------------------------|----------|----------|----------|----------|----------|
| <i>Gagea lutea</i> (L.) Ker-Gawl.                                                                      | Germany: Saxony-Anhalt, Rothenschirmbach                         | AJ488569 | –        | AJ416368 | –        | AJ488279 |
| <i>Gagea lutea</i> (L.) Ker-Gawl.                                                                      | Levichev 16 (LE)                                                 | AM265530 | –        | AM161456 | –        | AM110255 |
| <i>Gagea megapolitana</i> Henker                                                                       | Henker (HAL)                                                     | –        | –        | AM161455 | –        | AM084902 |
| <i>Gagea nakaiana</i> Kitag.                                                                           | Levichev 17 (LE)                                                 | AM180454 | –        | AM161457 | –        | AM110256 |
| <i>Gagea pratensis</i> (Pers.) Dumort.                                                                 | Germany: Saxony-Anhalt                                           | AJ437203 | –        | AJ416372 | –        | AJ437196 |
| <i>Gagea pratensis</i> (Pers.) Dumort.                                                                 | Germany: Brandenburg                                             | AJ437202 | –        | –        | –        | AJ437195 |
| <i>Gagea pratensis</i> (Pers.) Dumort.                                                                 | Germany: Saxony-Anhalt                                           | AJ437201 | –        | –        | –        | AJ419162 |
| <i>Gagea podolica</i> Schult. & Schult.f.                                                              | Levichev 21 (LE)                                                 | AM409334 | –        | AM238525 | –        | AM084903 |
| <i>Gagea pomeranica</i> R.Ruthe                                                                        | Germany: Mecklenburg-Western Pomerania 095846 (HAL)              | AJ429193 | –        | AJ429194 | –        | –        |
| <i>Gagea pomeranica</i> R.Ruthe                                                                        | Germany: Saxony-Anhalt 095842 (HAL)                              | AJ427543 | –        | AJ416375 | –        | AJ419167 |
| <i>Gagea pusilla</i> (F.W.Schmidt) Sweet                                                               | Levichev 18 (LE)                                                 | –        | –        | AM161458 | –        | AM180464 |
| <i>Gagea triflora</i> Schult. fl.                                                                      | Furse & Miyoshi 26159 (K)(Kew 23409)                             | –        | –        | –        | EU912246 | EU912331 |
| <i>Gagea triflora</i> Schult. fl.                                                                      | Levichev 46 (LE)                                                 | AM162674 | –        | AM049261 | –        | AJ890377 |
| <i>Gagea transversalis</i> (Pall.) Steven                                                              | Levichev 56 (LE)                                                 | AM162671 | –        | AJ973167 | –        | AJ890370 |
| <i>Gagea</i> subgenus <i>Hornungia</i> (Bernh.) Pascher: <i>Gagea</i> sect. <i>Platyspermum</i> Boiss. |                                                                  |          |          |          |          |          |
| <i>Gagea afghanica</i> A.Terracc.                                                                      | Zarrei & Golzarian 35257 (TUH)(Kew 23156)                        | EU912021 | EU912097 | EU939221 | EU912171 | EU912247 |
| <i>Gagea afghanica</i> A.Terracc.                                                                      | Zarrei & Golzarian 35223 (K, TUH)(Kew 23282)                     | EU912022 | EU912098 | EU939222 | –        | EU912248 |
| <i>Gagea afghanica</i> A.Terracc.                                                                      | Zarrei & Golzarian 35207 (K, TUH)(Kew 23283)                     | EU912023 | EU912099 | EU939223 | –        | EU912249 |
| <i>Gagea afghanica</i> A.Terracc.                                                                      | Levichev 52 (LE)                                                 | AM087953 | –        | AJ973160 | –        | AJ890373 |
| <i>Gagea alexeenkoana</i> Mischz.                                                                      | TUH-E BOT.EXP. 35305 (TUH)(Kew 23142)                            | EU912024 | EU912100 | EU939224 | EU912172 | EU912250 |
| <i>Gagea alexeenkoana</i> Mischz.                                                                      | TUH-E BOT.EXP. 35306 (TUH)(Kew 23297)                            | EU912030 | EU912106 | EU939229 | EU912179 | EU912257 |
| <i>Gagea alexeenkoana</i> Mischz.                                                                      | Levichev 34 (LE)                                                 | AM180458 | –        | AM161460 | –        | AM110257 |
| <i>Gagea altaica</i> Schischk. & Sumnev.                                                               | Levichev 51 (LE)                                                 | AM162670 | –        | AJ973159 | –        | AJ890374 |
| <i>Gagea bergii</i> Litv.                                                                              | Zarrei & Golzarian 35222 (TUH)(Kew 23141)                        | EU912026 | EU912102 | –        | EU912174 | EU912252 |
| <i>Gagea bulbifera</i> (Pall.) Salisb.                                                                 | TUH-E BOT.EXP. 35713 (TUH)(Kew 23140)                            | EU912027 | EU912104 | EU939226 | EU912176 | EU912254 |
| <i>Gagea bulbifera</i> (Pall.) Salisb.                                                                 | TUH-E BOT.EXP. 35709 (TUH)(Kew 23166)                            | EU912028 | EU912105 | EU939227 | EU912177 | EU912255 |
| <i>Gagea bulbifera</i> (Pall.) Salisb.                                                                 | Levichev 2 (LE)                                                  | AM162669 | –        | AM049260 | –        | AJ969119 |
| <i>Gagea capillifolia</i> Vved.                                                                        | Levichev 42 (LE)                                                 | AM087951 | –        | AJ973171 | –        | AJ970177 |
| <i>Gagea caroli-kochii</i> Grossh.                                                                     | TUH-E BOT.EXP. 35715 (TUH)(Kew 23139)                            | EU912029 | EU912170 | EU939228 | EU912178 | EU912256 |
| <i>Gagea chlorantha</i> (M.Bieb.) Schult. & Schult. f.                                                 | Zarrei & Kamrani 35192 (TUH)(Kew 23138)                          | EU912031 | EU912107 | EU939230 | EU912180 | EU912258 |
| <i>Gagea chlorantha</i> (M.Bieb.) Schult. & Schult. f.                                                 | Zarrei & Kamrani 35195 (TUH)(Kew 23167)                          | EU912032 | EU912108 | EU939231 | EU912181 | EU912259 |
| <i>Gagea chlorantha</i> (M.Bieb.) Schult. & Schult. f.                                                 | Zarrei & Zarre 778 (K, TUH)(Kew 23268)                           | EU912033 | EU912109 | EU939232 | EU912182 | EU912260 |
| <i>Gagea chlorantha</i> (M.Bieb.) Schult. & Schult. f.                                                 | Zarrei 872 (K, TUH)(Kew 23269)                                   | EU912034 | EU912110 | EU939233 | EU912183 | EU912261 |
| <i>Gagea chlorantha</i> (M.Bieb.) Schult. & Schult. f.                                                 | Hikmat Abbas Al-Ani & Danail & Danail Aoraha 9354 (K)(Kew 23275) | EU912035 | EU912111 | –        | –        | EU912262 |
| <i>Gagea chomutovae</i> (Pascher) Pascher                                                              | Zarrei & Golzarian 35214 (TUH)(Kew 23146)                        | EU912036 | EU912112 | EU939234 | EU912184 | EU912263 |
| <i>Gagea chomutovae</i> (Pascher) Pascher                                                              | Zarrei 35814 (TUH)(Kew 23168)                                    | EU912037 | EU912113 | EU939235 | EU912185 | EU912264 |
| <i>Gagea chomutovae</i> (Pascher) Pascher                                                              | Levichev 37 (LE)                                                 | AM087950 | –        | AM049262 | –        | AJ970176 |
| <i>Gagea circumplexa</i> Vved.                                                                         | Carter 721 (K)(Kew 23274)                                        | EU912038 | EU912114 | EU939236 | EU912186 | EU912265 |
| <i>Gagea circumplexa</i> Vved.                                                                         | Levichev 30 (LE)                                                 | AM265529 | –        | AJ973172 | –        | AJ969122 |
| <i>Gagea commutata</i> K.Koch                                                                          | Zarrei 876 (K, LE, TUH)(Kew 23336)                               | EU912039 | EU912115 | EU939237 | EU912187 | EU912266 |
| <i>Gagea commutata</i> K.Koch                                                                          | Dafni s.n. (Kew 23410)                                           | EU912096 | –        | EU939296 | EU912243 | EU912329 |
| <i>Gagea dayana</i> Chodat & Beauverd                                                                  | Davis 8235 (K)(Kew 23273)                                        | EU912042 | –        | –        | EU912190 | EU912269 |
| <i>Gagea eleonorae</i> Levichev                                                                        | Levichev 57 (LE)                                                 | AM287274 | –        | AJ973163 | –        | AJ970179 |
| <i>Gagea exilis</i> Vved.                                                                              | Moussavi & Tehrani 29971 (IRAN)(Kew 23182)                       | –        | –        | EU939242 | EU912193 | EU912272 |
| <i>Gagea gageoides</i> (Zucc.) Vved.                                                                   | Zarrei & Kamrani 35274 (TUH)(Kew 23172)                          | EU912049 | EU912169 | EU939247 | EU912198 | EU912277 |
| <i>Gagea gageoides</i> (Zucc.) Vved.                                                                   | TUH-E BOT.EXP. 35714 (TUH)(Kew 23145)                            | EU912048 | EU912168 | EU939246 | EU912197 | EU912276 |
| <i>Gagea gageoides</i> (Zucc.) Vved.                                                                   | Levichev 41 (LE)                                                 | AM162673 | –        | AM161462 | –        | AM084905 |
| <i>Gagea graeca</i> (L.) Irmisch.                                                                      | Davis 40591 (K)(Kew 23339)                                       | EU912077 | EU912159 | EU939285 | EU912235 | EU912316 |
| <i>Gagea graeca</i> (L.) Irmisch.                                                                      | Greece: Crete, Lassithi plateau 099962 (HAL)                     | AJ810089 | –        | AM049263 | –        | AJ810090 |
| <i>Gagea graeca</i> (L.) Irmisch.                                                                      | Greece: Lakonia                                                  | AJ810088 | –        | –        | –        | –        |
| <i>Gagea helicophylla</i> Levichev” ined.                                                              | Levichev 35a (LE)                                                | –        | –        | AM085145 | –        | AM084901 |
| <i>Gagea lactea</i> Levichev                                                                           | Levichev 53 (LE)                                                 | AM180452 | –        | AJ973166 | –        | AJ969125 |
| <i>Gagea libanotica</i> (Hochst.) Greuter                                                              | Townsend 74/38 (K)(Kew 23338)                                    | –        | EU912160 | EU939286 | EU912236 | EU912317 |
| <i>Gagea olgae</i> Regel                                                                               | Levichev 3 (LE)                                                  | –        | –        | AM085144 | –        | AM161465 |
| <i>Gagea ova</i> Stapf                                                                                 | Levichev 39b (LE)                                                | AM287277 | –        | AM265588 | –        | AM180466 |

Continued

| Taxa                                                         | Voucher information                                 | ITS      | <i>matK</i> | <i>psbA-trnH</i> | <i>rpl16</i> | <i>trnL-trnF</i><br>region |
|--------------------------------------------------------------|-----------------------------------------------------|----------|-------------|------------------|--------------|----------------------------|
| <i>Gagea ova</i> Stapf                                       | Levichev 39a (LE)                                   | AM287276 | –           | AM238526         | –            | AM180465                   |
| <i>Gagea reticulata</i> (Pall.) Schult. & Schult. f.         | Zarrei & Golzarian 35260 (TUH)(Kew 23150)           | EU912056 | EU912129    | EU939254         | EU912206     | EU912285                   |
| <i>Gagea reticulata</i> (Pall.) Schult. & Schult. f.         | Zarrei & Kamrani 35196 (TUH)(Kew 23174)             | EU912058 | EU912131    | EU939256         | EU912208     | EU912287                   |
| <i>Gagea reticulata</i> (Pall.) Schult. & Schult. f.         | Zarrei & Kamrani 35186 (K, TUH)(Kew 23284)          | EU912060 | EU912133    | EU939258         | EU912210     | EU912289                   |
| <i>Gagea reticulata</i> (Pall.) Schult. & Schult. f.         | Zarrei & Ajani 832 (IRAN, K, M, TUH)(Kew 23287)     | EU912061 | EU912134    | EU939259         | EU912211     | EU912290                   |
| <i>Gagea reticulata</i> (Pall.) Schult. & Schult. f.         | Levichev 56 (LE)                                    | –        | –           | AJ973162         | –            | –                          |
| <i>Gagea cf. reticulata</i> (Pall.) Schult. & Schult. f.     | Zarrei & Zarre 1032 (K)(Kew 23271)                  | EU912059 | EU912132    | EU939257         | EU912209     | EU912288                   |
| <i>Gagea setifolia</i> Baker                                 | Zarrei 35289 (TUH)(Kew 23149)                       | EU912055 | EU912128    | EU939253         | EU912205     | EU912284                   |
| <i>Gagea setifolia</i> Baker                                 | Zarrei & Golzarian 35246 (TUH)(Kew 23151)           | EU912063 | EU912136    | EU939261         | EU912213     | EU912292                   |
| <i>Gagea setifolia</i> Baker                                 | Zarrei & Golzarian 35254 (TUH)(Kew 23175)           | EU912064 | EU912137    | EU939262         | EU912214     | EU912293                   |
| <i>Gagea setifolia</i> Baker                                 | Heydari 30547 (K)(Kew 23267)                        | EU912065 | EU912138    | EU939263         | EU912215     | EU912294                   |
| <i>Gagea setifolia</i> Baker                                 | Zarrei 1017 (K)(Kew 23272)                          | EU912066 | EU912139    | EU939264         | EU912216     | EU912295                   |
| <i>Gagea setifolia</i> Baker                                 | Mohammadi 35198 (K, TUH)(Kew 23285)                 | EU912067 | EU912140    | EU939265         | EU912217     | EU912296                   |
| <i>Gagea setifolia</i> Baker                                 | Zarrei & Zarrei 35268 (K, TUH)(Kew 23290)           | EU912068 | EU912141    | EU939266         | EU912218     | EU912297                   |
| <i>Gagea setifolia</i> Baker                                 | Zarrei & Golzarian 35213 (K, TUH)(Kew 23291)        | EU912069 | EU912142    | EU939267         | EU912219     | EU912298                   |
| <i>Gagea cf. setifolia</i> Baker                             | Zarre 1009 (K, TUH)(Kew 23286)                      | EU912025 | EU912101    | EU939225         | EU912173     | EU912251                   |
| <i>Gagea cf. setifolia</i> Baker                             | Zarrei & Golzarian 35252 (K, TUH)(Kew 23292)        | EU912062 | EU912135    | EU939260         | EU912212     | EU912291                   |
| <i>Gagea stipitata</i> Merckl. ex Bunge                      | Zarre & Zarrei 35297 (TUH)(Kew 23154)               | EU912070 | EU912143    | EU939268         | EU912220     | EU912299                   |
| <i>Gagea stipitata</i> Merckl. ex Bunge                      | Zarrei & Kamrani 35275 (TUH)(Kew 23176)             | EU912071 | EU912144    | EU939269         | EU912221     | EU912300                   |
| <i>Gagea stipitata</i> Merckl. ex Bunge                      | Zarrei & Kamrani 35197 (TUH)(Kew 23177)             | EU912072 | EU912145    | EU939270         | EU912222     | EU912301                   |
| <i>Gagea stipitata</i> Merckl. ex Bunge                      | Zarrei & Golzarian 35215 (K, TUH)(Kew 23293)        | EU912073 | EU912146    | EU939271         | EU912223     | EU912302                   |
| <i>Gagea tenera</i> Pascher                                  | Zarrei & Golzarian 35256 (TUH)(Kew 23152)           | EU912074 | EU912147    | EU939272         | EU912224     | EU912303                   |
| <i>Gagea tenera</i> Pascher                                  | Zarrei & Golzarian 35219 (K, TUH)(Kew 23281)        | EU912075 | EU912148    | EU939273         | EU912225     | EU912304                   |
| <i>Gagea uliginosa</i> Siehe & Pascher                       | TUH-E BOT.EXP. 35304 (TUH)(Kew 23153)               | EU912089 | EU912155    | EU939281         | EU912233     | EU912312                   |
| <i>Gagea uliginosa</i> Siehe & Pascher                       | Moussavi <i>et al.</i> 30018 (IRAN)(Kew 23288)      | EU912090 | EU912157    | EU939283         | –            | EU912314                   |
| <i>Gagea uliginosa</i> Siehe & Pascher                       | Rawi & Serhang 18286 (K)(Kew 23277)                 | –        | EU912156    | EU939282         | EU912234     | EU912313                   |
| <i>Gagea vegeta</i> Vved.                                    | Shafii 475 (Shahed University Herbarium)(Kew 23181) | EU912076 | EU912149    | EU939274         | EU912226     | EU912305                   |
| <i>Gagea vegeta</i> Vved.                                    | Zarrei and Zarre, 1033 (K, TUH)(Kew 23335)          | –        | EU912150    | EU939275         | EU912227     | EU912306                   |
| <i>Gagea vegeta</i> Vved.                                    | Levichev 32 (LE)                                    | AM287275 | –           | AM238520         | –            | AM180468                   |
| <i>Gagea wendelboi</i> Rech.f.                               | Matin 35605 (IRAN)(Kew 23183)                       | EU912091 | EU912158    | EU939284         | –            | EU912315                   |
| <i>Gagea</i> sp.                                             | Zarrei & Kamrani 35194 (TUH)(Kew 23155)             | EU912057 | EU912130    | EU939255         | EU912207     | EU912286                   |
| <i>Gagea</i> sect. <i>Plaeostigma</i> (Turcz.) Pascher       |                                                     |          |             |                  |              |                            |
| <i>Gagea iranica</i> Zarrei & Zarre                          | Zarrei & Golzarian 35210 (TUH)(Kew 23147)           | EU912050 | EU912123    | EU939248         | EU912200     | EU912279                   |
| <i>Gagea iranica</i> Zarrei & Zarre                          | Zarrei & Golzarian 35251 (TUH)(Kew 23173)           | EU912051 | EU912124    | EU939249         | EU912201     | EU912280                   |
| <i>Gagea pauciflora</i> (Turcz. ex Trautv.) Turcz. ex Ledeb. | Mongolia: Ulan Bator 070423 (HAL)                   | AM409330 | –           | AJ973168         | –            | AJ890372                   |
| <i>Lloydia delicatula</i> Noltie                             | AGSES 212 (K)(Kew 23340)                            | EU912079 | –           | –                | –            | EU912320                   |
| <i>Lloydia flavonutans</i> H.Hara                            | AGSES 77 (K)(Kew 23341)                             | EU912080 | –           | –                | EU912238     | EU912321                   |
| <i>Lloydia oxycarpa</i> Franch.                              | ACE 137 (K)(Kew 23342)                              | EU912081 | –           | EU939289         | –            | EU912322                   |
| <i>Lloydia serotina</i> (L.) Rchb.                           | Jones s.n. (K)(Kew 1004)                            | EU912092 | AY624471    | EU939288         | –            | EU912319                   |
| <i>Lloydia serotina</i> (L.) Rchb.                           | Levichev 45a (LE)                                   | AM087956 | –           | AM238530         | –            | AJ890376                   |
| <i>Lloydia serotina</i> (L.) Rchb.                           | Bulgaria: Ovtsharez 074806 (HAL)                    | –        | –           | AJ585048         | –            | AJ585049                   |
| <i>Lloydia yunnanensis</i> Franch.                           | Luo, Yi-bo 64 (K)(Kew 23337)                        | EU912078 | EU912161    | EU939287         | EU912237     | EU912318                   |
| <b>Outgroup members</b>                                      |                                                     |          |             |                  |              |                            |
| <i>Tulipa clusiana</i> DC.                                   | Zarrei 35183 (TUH)(Kew 23348)                       | EU912093 | EU912162    | EU939290         | EU912239     | EU912323                   |
| <i>Tulipa lehmanniana</i> Merckl.                            | Zarrei & Golzarian 35228A (TUH)(Kew 23349)          | EU912094 | EU912163    | EU939291         | EU912240     | EU912324                   |
| <i>Tulipa uniflora</i> (L.) Besser ex Baker                  | Chase 751 (K)                                       | –        | EU912164    | EU939292         | EU912241     | EU912325                   |
| <i>Amana erythronioides</i> (Baker) D. Y. Tan & D. Y. Hong   | Chase 742 (K)                                       | EU912095 | AY624472    | EU939293         | EU912020     | EU912326                   |
| <i>Erythronium japonicum</i> Decne.                          | Chase 780 (K)                                       | EU912083 | AF485323    | EU939295         | AF485323*    | EU912332                   |
| <i>Fritillaria persica</i> L.                                | Chase 3496 (K)                                      | AY616736 | AY624451    | AY624399         | AY624399     | EU912327                   |
| <i>Lilium ledebourii</i> (Baker) Boiss.                      | Zarrei s.n. (TUH)(Kew 23346)                        | –        | EU912165    | EU939299         | EU912242     | EU912328                   |

\* Voucher differs from those on the voucher list; it has been taken from NCBI.
